# Supplementary material
Source: publisher figshare collection journal article supplement (https://diabetesjournals.figshare.com/ndownloader/files/24530900)
Supplement: Supplementary file 1 [file 24530900]

## Supplementary materials

**Table S1.** Baseline characteristics of men and women by diabetes status at follow-up

**Table S2.** Baseline characteristics of participants and non-participants

**Table S3.** Characteristics of different submodels and final growth model for body mass index (BMI) in men

**Table S4.** Characteristics of different submodels and final growth model for body mass index (BMI) in women

**Table S5.** Characteristics of different submodels and final growth model for fasting plasma glucose (FPG) in men

**Table S6.** Characteristics of different submodels and final growth model for fasting plasma glucose (FPG) in women

**Table S7.** Characteristics of different submodels and final growth model for systolic blood pressure (SBP) in men

**Table S8.** Characteristics of different submodels and final growth model for systolic blood pressure (SBP) in women

**Table S9.** Characteristics of different submodels and final growth model for diastolic blood pressure (DBP) in men

**Table S10.** Characteristics of different submodels and final growth model for diastolic blood pressure (DBP) in women

**Table S11.** Characteristics of different submodels and final growth model for high density lipoprotein cholesterol (HDL-C) in men

**Table S12.** Characteristics of different submodels and final growth model for high density lipoprotein cholesterol (HDL-C) in women

**Table S13.** Characteristics of different submodels and final growth model for total cholesterol (TC) in men

**Table S14.** Characteristics of different submodels and final growth model for total cholesterol (TC) in women

**Table S15.** Characteristics of different submodels and final growth model for natural logarithm of triglyceride (Ln-TG) in men

**Table S16.** Characteristics of different submodels and final growth model for natural logarithm of triglyceride (Ln-TG) in women

**Table S17.** Characteristics of different submodels and final growth model for 2-h post-load plasma (2-hPG) in men

**Table S18.** Characteristics of different submodels and final growth model for 2-h post-load plasma (2-hPG) in women

**Supplementary Figure 1:** Study sample selection flow chart

**Supplementary Figure 2:** Mean predicted value for metabolic risk factors from mixed effects models by gender.

**Table S1.** Baseline characteristics of men and women by diabetes status at follow-up

|                                     | Men               |                            |          | Women             |                            |          |
|-------------------------------------|-------------------|----------------------------|----------|-------------------|----------------------------|----------|
|                                     | Diabetes<br>n=316 | Without diabetes<br>n=2753 | *P value | Diabetes<br>n=427 | Without diabetes<br>n=3667 | *P value |
| Age (years)                         | 45.4 (12.1)       | 39.7 (13.2)                | <0.001   | 43.8 (11.8)       | 37.7 (12.3)                | <0.001   |
| BMI (kg/m <sup>2</sup> )            | 27.4 (3.7)        | 25.3 (3.9)                 | <0.001   | 29.8 (5.0)        | 26.6 (4.6)                 | <0.001   |
| FPG (mmol/L)                        | 5.2 (0.5)         | 4.9 (0.4)                  | <0.001   | 5.2 (0.5)         | 4.8 (0.4)                  | <0.001   |
| SBP (mmHg)                          | 123.3 (17.6)      | 116.5 (15.0)               | <0.001   | 121.1 (17.6)      | 113.3 (16.3)               | <0.001   |
| DBP (mmHg)                          | 81.3 (10.4)       | 76.0 (10.1)                | <0.001   | 79.6 (10.1)       | 75.1 (10.2)                | <0.001   |
| HDL-C (mmol/L)                      | 0.96 (0.21)       | 0.98 (0.24)                | 0.067    | 1.10 (0.28)       | 1.18 (0.29)                | <0.001   |
| TC (mmol/L)                         | 5.61 (1.02)       | 5.08 (1.08)                | <0.001   | 5.74 (1.23)       | 5.19 (1.17)                | <0.001   |
| Ln-TG (mmol/L)                      | 0.74 (0.49)       | 0.48 (0.54)                | <0.001   | 0.64 (0.51)       | 0.29 (0.52)                | <0.001   |
| 2-hPG (mmol/L)                      | 6.5 (1.7)         | 5.4 (1.4)                  | <0.001   | 6.9 (1.5)         | 5.7 (1.3)                  | <0.001   |
| Smokers                             | 83 (26.3)         | 835 (30.5)                 | 0.136    | 12 (2.8)          | 140 (3.8)                  | 0.345    |
| Family history of diabetes<br>(yes) | 116 (36.7)        | 620 (22.5)                 | <0.001   | 147 (34.4)        | 903 (24.6)                 | <0.001   |
| Physical activity (low)             | 245 (79.3)        | 1861 (70.6)                | 0.001    | 303 (73.2)        | 2415 (69.6)                | 0.140    |

Values are mean (SD) for continuous variables and frequency (percentage) for categorical variables.

P values show statistical differences based on t-test and chi-square test for continuous and categorical variables, respectively.

**BMI:** body mass index; **FPG:** fasting plasma glucose; **TC:** total cholesterol; **SBP:** systolic blood pressure, **DBP:** diastolic blood pressure;

**HDL-C:** high-density lipoprotein cholesterol; **2-hPG:** 2-h post-load plasma; **Ln-TG:** natural logarithm of triglyceride; **SD:** standard deviation

**Table S2.** Baseline characteristics of participants and non-participants

|                                  | <b>Non-Participants<br/>n=3905</b> | <b>Participants<br/>n=7163</b> | <b>*P value</b> |
|----------------------------------|------------------------------------|--------------------------------|-----------------|
| Male (%)                         | 1731 (44.3)                        | 3069 (42.8)                    | 0.069           |
| Age (years)                      | 39.6 (14.0)                        | 39.2 (12.8)                    | 0.180           |
| BMI (kg/m <sup>2</sup> )         | 26.8 (5.1)                         | 26.3 (4.5)                     | <0.001          |
| FPG (mmol/L)                     | 5.1 (0.6)                          | 4.9 (0.5)                      | <0.001          |
| SBP (mmHg)                       | 117.9 (18.5)                       | 115.4 (16.2)                   | <0.001          |
| DBP (mmHg)                       | 77.4 (11.1)                        | 76.0 (10.3)                    | <0.001          |
| HDL (mmol/L)                     | 1.07 (0.3)                         | 1.09 (0.3)                     | 0.017           |
| TC (mmol/L)                      | 5.2 (1.2)                          | 5.2 (1.1)                      | 0.364           |
| Ln-TG (mmol/L)                   | 0.45 (0.57)                        | 0.40 (0.57)                    | <0.001          |
| 2-hPG (mmol/L)                   | 6.1 (1.7)                          | 5.7 (1.4)                      | <0.001          |
| Smokers                          | 769 (20.9)                         | 1070 (15.0)                    | <0.001          |
| Family history of diabetes (yes) | 1010 (25.9)                        | 1786 (24.9)                    | 0.146           |
| Physical activity (low)          | 2481 (70.6)                        | 4824 (70.6)                    | 0.481           |

Values are mean (SD) for continuous variables and frequency (percentage) for categorical variables. P values show statistical differences based on t-test and chi-square test for continuous and categorical variables, respectively.

**BMI:** body mass index; **FPG:** fasting plasma glucose; **TC:** total cholesterol; **SBP:** systolic blood pressure, **DBP:** diastolic blood pressure; **HDL-C:** high-density lipoprotein cholesterol; **2-hPG:** 2-h post-load plasma; **Ln-TG:** natural logarithm of triglyceride; **SD:** standard deviation

**Table S3.** Characteristics of different submodels and final growth model for body mass index (BMI) in men

|                                                |                | Value (Standard error), P value |                         |                         |                          |                          |                           |                          |
|------------------------------------------------|----------------|---------------------------------|-------------------------|-------------------------|--------------------------|--------------------------|---------------------------|--------------------------|
|                                                | Notation       | Model 1                         | Model 2                 | Model 3                 | Model 4                  | Model 5                  | Model 6                   | Final model              |
| <b>Intercept</b>                               | $\beta_0$      | 26.73(0.07),<br><0.001          | 26.70 (0.07),<br><0.001 | 27.37(0.07),<br><0.001  | 27.41 (0.07),<br><0.001  | 27.44 (0.08),<br><0.001  | 27.41 (0.07),<br><0.001   | 27.42 (0.08),<br><0.001  |
| <b>Age</b>                                     | $\beta_1$      |                                 | 0.11(0.002),<br><0.001  | 0.11(0.002),<br><0.001  | 0.08 (0.002),<br><0.001  | 0.08 (0.003),<br><0.001  | 0.075 (0.003),<br><0.001  | 0.077 (0.003),<br><0.001 |
| <b>Age<sup>2</sup></b>                         | $\beta_2$      |                                 |                         | -0.03(0.001),<br><0.001 | -0.03(0.001),<br><0.001  | -0.03 (0.001),<br><0.001 | -0.04 (0.001),<br><0.001  | -0.04 (0.001),<br><0.001 |
| <b>Age<sup>3</sup></b>                         | $\beta_3$      |                                 |                         |                         | 0.001(0.0001),<br><0.001 | 0.001(0.0001),<br><0.001 | 0.001 (0.0001),<br><0.001 | 0.001 (0.0001)           |
| <b>Variance of random intercept</b>            | $\sigma^2 u_0$ | 14.44 (0.38)                    | 17.44 (0.47)            | 16.71 (0.44)            | 16.44 (0.43)             | 16.57 (0.11)             | 17.01 (0.48)              | 17.01 (0.48)             |
| <b>Variance of random Age term</b>             | $\sigma^2 u_1$ |                                 |                         |                         |                          | 0.01 (0.06)              | 0.012 (0.0008)            | 0.012 (0.0009)           |
| <b>Variance of random Age<sup>2</sup> term</b> | $\sigma^2 u_2$ |                                 |                         |                         |                          |                          | 0.0006 (0.0001)           | 0.0006 (0.0001)          |
| <b>AIC</b>                                     |                | 65360.16                        | 63219.39                | 61684.86                | 61522.01                 | 60651.5                  | 60400.9                   | 60272.06                 |
| <b>Log Likelihood (P value for LR test)</b>    |                | -32677.08                       | -31605.7<br>(<0.001)    | -30837.43<br>(<0.001)   | -30755<br>(<0.001)       | -30317.8<br>(<0.001)     | -30189.4<br>(<0.001)      | -30123.0<br>(<0.001)     |

**Model 1:** Unconditional mean

Level 1:  $BMI_{ij} = b_{0i} + e_{ij}$

Level 2:  $b_{0i} = \beta_0 + u_{0i}$

**Model 2:** Unconditional growth model

Level 1:  $BMI_{ij} = b_{0i} + b_1 Age_{ij} + e_{ij}$

Level 2:  $b_{0i} = \beta_0 + u_{0i}$

Level 2:  $b_{1i} = \beta_1$

**Model 3:** Quadratic unconditional growth model

Level 1:  $BMI_{ij} = b_{0i} + b_1 Age_{ij} + b_2 Age_{ij}^2 + e_{ij}$

Level 2:  $b_{0i} = \beta_0 + u_{0i}$

Level 2:  $b_{1i} = \beta_1$

Level 2:  $b_{2i} = \beta_2$

**Model 4:** Cubic unconditional growth model

Level 1:  $BMI_{ij} = b_{0i} + b_1 Age_{ij} + b_2 Age_{ij}^2 + b_3 Age_{ij}^3 + e_{ij}$

Level 2:  $b_{0i} = \beta_0 + u_{0i}$

Level 2:  $b_{1i} = \beta_1$

Level 2:  $b_{2i} = \beta_2$

Level 2:  $b_{3i} = \beta_3$

**Model 5:** Cubic growth model with the intercept and slope variability

Level 1:  $BMI_{ij} = b_{0i} + b_1 Age_{ij} + b_2 Age_{ij}^2 + b_3 Age_{ij}^3 + e_{ij}$

Level 2:  $b_{0i} = \beta_0 + u_{0i}$

Level 2:  $b_{1i} = \beta_1 + u_{1i}$

Level 2:  $b_{2i} = \beta_2$

Level 2:  $b_{3i} = \beta_3$

**Model 6:** Cubic growth model with the intercept and slopes variability

Level 1:  $BMI_{ij} = b_{0i} + b_1 Age_{ij} + b_2 Age_{ij}^2 + b_3 Age_{ij}^3 + e_{ij}$

Level 2:  $b_{0i} = \beta_0 + u_{0i}$

Level 2:  $b_{1i} = \beta_1 + u_{1i}$

Level 2:  $b_{2i} = \beta_2 + u_{2i}$

Level 2:  $b_{3i} = \beta_3$

**Final Model:** Was obtained with adding following error structure into Model 6:

**RCS:** First-Order

Autoregressive

**RH:**  $\sigma^2 \times |Age|^{2\delta}$

In level 1 of growth models, change over time is modelled at individual-level, and in level 2, it is modelled at group-level.

$\beta_k$  represent population parameter or fixed effect;  $b_{ki}$  represent individual component or random effects;  $u_{ki}$  represents the deviation of  $b_{ki}$  from the value of  $\beta_k$  in the population for individual  $i$ .

Models 1 to 6 were developed without testing residual correlation structure and residual heteroscedasticity, and after reaching the optimal function, three commonly examined types of correlation and variance structure were tested to select the optimal error structure (**Final model**).

**AIC:** Akaike Information Criterion; **Log Likelihood** represents the maximum likelihood estimator of the parameter, and P value is a test of this difference using a likelihood ratio (LR) test; **RCS:** Residual correlation structure; **RH:** Residual heteroscedasticity;  $\sigma^2 \times |Age|^{2\delta}$ : Variance proportional to the absolute value of Age raised to a constant power

**Table S4.** Characteristics of different submodels and final growth model for body mass index (BMI) in women

| Value (Standard Error), P value                                                                                                                                                                                                                                                                                                                                                                                                                                                                                                                                                                                                                                                                                                                                                                                                                                                                                                                                                                                                                                                                                                                                                                                                                                                                                                                                      |                |                                                                                                                                                                                                                                                                                                                                                                                                                                                                                                         |                         |                                                                                                                                                                                       |                           |                            |                           |                           |
|----------------------------------------------------------------------------------------------------------------------------------------------------------------------------------------------------------------------------------------------------------------------------------------------------------------------------------------------------------------------------------------------------------------------------------------------------------------------------------------------------------------------------------------------------------------------------------------------------------------------------------------------------------------------------------------------------------------------------------------------------------------------------------------------------------------------------------------------------------------------------------------------------------------------------------------------------------------------------------------------------------------------------------------------------------------------------------------------------------------------------------------------------------------------------------------------------------------------------------------------------------------------------------------------------------------------------------------------------------------------|----------------|---------------------------------------------------------------------------------------------------------------------------------------------------------------------------------------------------------------------------------------------------------------------------------------------------------------------------------------------------------------------------------------------------------------------------------------------------------------------------------------------------------|-------------------------|---------------------------------------------------------------------------------------------------------------------------------------------------------------------------------------|---------------------------|----------------------------|---------------------------|---------------------------|
|                                                                                                                                                                                                                                                                                                                                                                                                                                                                                                                                                                                                                                                                                                                                                                                                                                                                                                                                                                                                                                                                                                                                                                                                                                                                                                                                                                      | Notation       | Model 1                                                                                                                                                                                                                                                                                                                                                                                                                                                                                                 | Model 2                 | Model 3                                                                                                                                                                               | Model 4                   | Model 5                    | Model 6                   | Final model               |
| Intercept                                                                                                                                                                                                                                                                                                                                                                                                                                                                                                                                                                                                                                                                                                                                                                                                                                                                                                                                                                                                                                                                                                                                                                                                                                                                                                                                                            | $\beta_0$      | 28.55(0.07),<br><0.001                                                                                                                                                                                                                                                                                                                                                                                                                                                                                  | 28.83 (0.07),<br><0.001 | 29.29 (0.07),<br><0.001                                                                                                                                                               | 29.29 (0.07),<br><0.001   | 29.30 (0.07),<br><0.001    | 29.30 (0.07),<br><0.001   | 29.30 (0.07),<br><0.001   |
| Age                                                                                                                                                                                                                                                                                                                                                                                                                                                                                                                                                                                                                                                                                                                                                                                                                                                                                                                                                                                                                                                                                                                                                                                                                                                                                                                                                                  | $\beta_1$      |                                                                                                                                                                                                                                                                                                                                                                                                                                                                                                         | 0.17 (0.002),<br><0.001 | 0.17 (0.002),<br><0.001                                                                                                                                                               | 0.16 (0.003),<br><0.001   | 0.15 (0.003),<br><0.001    | 0.15 (0.003),<br><0.001   | 0.16(0.003),<br><0.001    |
| Age <sup>2</sup>                                                                                                                                                                                                                                                                                                                                                                                                                                                                                                                                                                                                                                                                                                                                                                                                                                                                                                                                                                                                                                                                                                                                                                                                                                                                                                                                                     | $\beta_2$      |                                                                                                                                                                                                                                                                                                                                                                                                                                                                                                         |                         | -0.03 (0.0009),<br><0.001                                                                                                                                                             | -0.03 (0.0009),<br><0.001 | -0.02 (0.001),<br><0.001   | -0.03 (0.001),<br><0.001  | -0.03 (0.001),<br><0.001  |
| Age <sup>3</sup>                                                                                                                                                                                                                                                                                                                                                                                                                                                                                                                                                                                                                                                                                                                                                                                                                                                                                                                                                                                                                                                                                                                                                                                                                                                                                                                                                     | $\beta_3$      |                                                                                                                                                                                                                                                                                                                                                                                                                                                                                                         |                         |                                                                                                                                                                                       | 0.0002(0.0001),<br><0.001 | 0.0007 (0.0001),<br><0.001 | 0.0004 (0.0001),<br><0.01 | 0.0003 (0.0001),<br><0.01 |
| Variance of random intercept                                                                                                                                                                                                                                                                                                                                                                                                                                                                                                                                                                                                                                                                                                                                                                                                                                                                                                                                                                                                                                                                                                                                                                                                                                                                                                                                         | $\sigma^2 u_0$ | 20.94 (0.48)                                                                                                                                                                                                                                                                                                                                                                                                                                                                                            | 20.25 (0.46)            | 19.41 (0.44)                                                                                                                                                                          | 19.40 (0.44)              | 21.29 (0.11)               | 21.68 (0.52)              | 21.27 (0.52)              |
| Variance of random Age term                                                                                                                                                                                                                                                                                                                                                                                                                                                                                                                                                                                                                                                                                                                                                                                                                                                                                                                                                                                                                                                                                                                                                                                                                                                                                                                                          | $\sigma^2 u_1$ |                                                                                                                                                                                                                                                                                                                                                                                                                                                                                                         |                         |                                                                                                                                                                                       |                           | 0.02 (0.08)                | 0.02 (0.0009)             | 0.01(0.001)               |
| Variance of random Age <sup>2</sup> term                                                                                                                                                                                                                                                                                                                                                                                                                                                                                                                                                                                                                                                                                                                                                                                                                                                                                                                                                                                                                                                                                                                                                                                                                                                                                                                             | $\sigma^2 u_2$ |                                                                                                                                                                                                                                                                                                                                                                                                                                                                                                         |                         |                                                                                                                                                                                       |                           |                            | 0.0009 (0.0001)           | 0.0008 (0.0001)           |
| AIC                                                                                                                                                                                                                                                                                                                                                                                                                                                                                                                                                                                                                                                                                                                                                                                                                                                                                                                                                                                                                                                                                                                                                                                                                                                                                                                                                                  |                | 95547.99                                                                                                                                                                                                                                                                                                                                                                                                                                                                                                | 89746.35                | 88894.02                                                                                                                                                                              | 88888.71                  | 87158.5                    | 86827.63                  | 86691.11                  |
| Log Likelihood (P value for LR test)                                                                                                                                                                                                                                                                                                                                                                                                                                                                                                                                                                                                                                                                                                                                                                                                                                                                                                                                                                                                                                                                                                                                                                                                                                                                                                                                 |                | -47771.00                                                                                                                                                                                                                                                                                                                                                                                                                                                                                               | -44869.17<br>(<0.001)   | -44442.01<br>(<0.001)                                                                                                                                                                 | -44438.36<br>(0.006)      | -43571.30<br>(<0.001)      | -43402.82<br>(<0.001)     | -43332.56<br>(<0.001)     |
| <div> <div> <b>Model 1:</b> Unconditional mean<br/> Level 1: BMI<sub>ij</sub>= b<sub>oi</sub> + e<sub>ij</sub><br/> Level 2: b<sub>oi</sub> = <math>\beta_0</math> + u<sub>0i</sub> </div> <div> <b>Model 2:</b> Unconditional growth model<br/> Level 1: BMI<sub>ij</sub>= b<sub>oi</sub> + b<sub>1</sub>Age<sub>ij</sub> + e<sub>ij</sub><br/> Level 2: b<sub>oi</sub> = <math>\beta_0</math> + u<sub>0i</sub><br/> Level 2: b<sub>1i</sub> = <math>\beta_1</math> </div> <div> <b>Model 3:</b> Quadratic unconditional growth model<br/> Level 1: BMI<sub>ij</sub>= b<sub>oi</sub> + b<sub>1</sub>Age<sub>ij</sub> + b<sub>2</sub>Age<sub>ij</sub><sup>2</sup> + e<sub>ij</sub><br/> Level 2: b<sub>oi</sub> = <math>\beta_0</math> + u<sub>0i</sub><br/> Level 2: b<sub>1i</sub> = <math>\beta_1</math><br/> Level 2: b<sub>2i</sub> = <math>\beta_2</math> </div> <div> <b>Model 4:</b> Cubic unconditional growth model<br/> Level 1: BMI<sub>ij</sub>= b<sub>oi</sub> + b<sub>1</sub>Age<sub>ij</sub> + b<sub>2</sub>Age<sub>ij</sub><sup>2</sup> + b<sub>3</sub>Age<sub>ij</sub><sup>3</sup> + e<sub>ij</sub><br/> Level 2: b<sub>oi</sub> = <math>\beta_0</math> + u<sub>0i</sub><br/> Level 2: b<sub>1i</sub> = <math>\beta_1</math><br/> Level 2: b<sub>2i</sub> = <math>\beta_2</math><br/> Level 2: b<sub>3i</sub> = <math>\beta_3</math> </div> </div> |                |                                                                                                                                                                                                                                                                                                                                                                                                                                                                                                         |                         |                                                                                                                                                                                       |                           |                            |                           |                           |
| <b>Model 5:</b> Cubic growth model with the intercept and slope variability<br>Level 1: BMI <sub>ij</sub> = b <sub>oi</sub> + b <sub>1</sub> Age <sub>ij</sub> + b <sub>2</sub> Age <sub>ij</sub> <sup>2</sup> + b <sub>3</sub> Age <sub>ij</sub> <sup>3</sup> + e <sub>ij</sub><br>Level 2: b <sub>oi</sub> = $\beta_0$ + u <sub>0i</sub><br>Level 2: b <sub>1i</sub> = $\beta_1$ + u <sub>1i</sub><br>Level 2: b <sub>2i</sub> = $\beta_2$<br>Level 2: b <sub>3i</sub> = $\beta_3$                                                                                                                                                                                                                                                                                                                                                                                                                                                                                                                                                                                                                                                                                                                                                                                                                                                                                 |                | <b>Model 6:</b> Cubic growth model with the intercept and slopes variability<br>Level 1: BMI <sub>ij</sub> = b <sub>oi</sub> + b <sub>1</sub> Age <sub>ij</sub> + b <sub>2</sub> Age <sub>ij</sub> <sup>2</sup> + b <sub>3</sub> Age <sub>ij</sub> <sup>3</sup> + e <sub>ij</sub><br>Level 2: b <sub>oi</sub> = $\beta_0$ + u <sub>0i</sub><br>Level 2: b <sub>1i</sub> = $\beta_1$ + u <sub>1i</sub><br>Level 2: b <sub>2i</sub> = $\beta_2$ + u <sub>2i</sub><br>Level 2: b <sub>3i</sub> = $\beta_3$ |                         | <b>Final Model:</b> Was obtained with adding following error structure into Model 6:<br><b>RCS:</b> First-Order Autoregressive<br><b>RH:</b> $\sigma^2 \times e^{2\delta \times Age}$ |                           |                            |                           |                           |

In level 1 of growth models, change over time is modelled at individual-level, and in level 2, it is modelled at group-level.

$\beta_k$  represent population parameter or fixed effect;  $b_{ki}$  represent individual component or random effects;  $u_{ki}$  represents the deviation of  $b_{ki}$  from the value of  $\beta_k$  in the population for individual  $i$ .

Models 1 to 6 were developed without testing residual correlation structure and residual heteroscedasticity, and after reaching the optimal function, three commonly examined types of correlation and variance structure were tested to select the optimal error structure (**Final model**).

**AIC:** Akaike Information Criterion; **Log Likelihood** represents the maximum likelihood estimator of the parameter, and P value is a test of this difference using a likelihood ratio (LR) test; **RCS:** Residual correlation structure; **RH:** Residual heteroscedasticity;  $\sigma^2 \times e^{2\delta \times Age}$ : variance proportional to the exponential of Age multiplied by a constant

**Table S5.** Characteristics of different submodels and final growth model for fasting plasma glucose (FPG) in men

|                                      | Notation       | Value (Standard Error), P value |                          |                            |                            |                            |
|--------------------------------------|----------------|---------------------------------|--------------------------|----------------------------|----------------------------|----------------------------|
|                                      |                | Model 1                         | Model 2                  | Model 3                    | Model 4                    | Final model                |
| Intercept                            | $\beta_0$      | 5.14 (0.01),<br><0.001          | 5.13 (0.01),<br><0.001   | 5.18 (0.01),<br><0.001     | 5.18 (0.01),<br><0.001     | 5.18 (0.01),<br><0.001     |
| Age                                  | $\beta_1$      |                                 | 0.01 (0.0004),<br><0.001 | 0.01 (0.0004),<br><0.001   | 0.01 (0.0004),<br><0.001   | 0.01 (0.0004),<br><0.001   |
| Age <sup>2</sup>                     | $\beta_2$      |                                 |                          | -0.002 (0.0002),<br><0.001 | -0.002 (0.0002),<br><0.001 | -0.002 (0.0002),<br><0.001 |
| Variance of random intercept         | $\sigma^2 u_0$ | 0.10 (0.004)                    | 0.11 (0.004)             | 0.11 (0.004)               | 0.11 (0.004)               | 0.11 (0.004)               |
| Variance of random Age term          | $\sigma^2 u_1$ |                                 |                          |                            | 0.00003 (0.00001)          | 0.00003 (0.00001)          |
| AIC                                  |                | 18565.28                        | 17405.42                 | 17263.34                   | 17170.78                   | 17157.73                   |
| Log Likelihood (P value for LR test) |                | -9279.641                       | -8698.711<br>(<0.001)    | -8626.670<br>(<0.001)      | -8578.39<br>(<0.001)       | -8570.864<br>(<0.001)      |

**Model 1:** Unconditional mean

Level 1:  $FPG_{ij} = b_{0i} + e_{ij}$

Level 2:  $b_{0i} = \beta_0 + u_{0i}$

**Model 2:** Unconditional growth model

Level 1:  $FPG_{ij} = b_{0i} + b_1 Age_{ij} + e_{ij}$

Level 2:  $b_{0i} = \beta_0 + u_{0i}$

Level 2:  $b_{1i} = \beta_1$

**Model 3:** Quadratic unconditional growth model

Level 1:  $FPG_{ij} = b_{0i} + b_1 Age_{ij} + b_2 Age_{ij}^2 + e_{ij}$

Level 2:  $b_{0i} = \beta_0 + u_{0i}$

Level 2:  $b_{1i} = \beta_1$

Level 2:  $b_{2i} = \beta_2$

**Model 4:** Quadratic growth model with the intercept and slope variability

Level 1:  $FPG_{ij} = b_{0i} + b_1 Age_{ij} + b_2 Age_{ij}^2 + e_{ij}$

Level 2:  $b_{0i} = \beta_0 + u_{0i}$

Level 2:  $b_{1i} = \beta_1 + u_{1i}$

Level 2:  $b_{2i} = \beta_2$

**Final Model:** Was obtained with adding following error structure into Model 4:

**RCS:** Was not adjusted for residual correlation structure

**RH:**  $\sigma^2 \times e^{2\delta \times Age}$

In level 1 of growth models, change over time is modelled at individual-level, and in level 2, it is modelled at group-level.

$\beta_k$  represent population parameter or fixed effect;  $b_{ki}$  represent individual component or random effects;  $u_{ki}$  represents the deviation of  $b_{ki}$  from the value of  $\beta_k$  in the population for individual  $i$ .

Models 1 to 4 were developed without testing residual correlation structure and residual heteroscedasticity, and after reaching the optimal function, three commonly examined types of correlation and variance structure were tested to select the optimal error structure (**Final model**).

**AIC:** Akaike Information Criterion; **Log Likelihood** represents the maximum likelihood estimator of the parameter, and P value is a test of this difference using a likelihood ratio (**LR**) test; **RCS:** Residual correlation structure; **RH:** Residual heteroscedasticity;  $\sigma^2 \times e^{2\delta \times Age}$ : variance proportional to the exponential of Age multiplied by a constant

**Table S6.** Characteristics of different submodels and final growth model for fasting plasma glucose (FPG) in women

|                                      | Value (Standard Error), P value |                        |                          |                            |                            |                            |
|--------------------------------------|---------------------------------|------------------------|--------------------------|----------------------------|----------------------------|----------------------------|
|                                      | Notation                        | Model 1                | Model 2                  | Model 3                    | Model 4                    | Final model                |
| Intercept                            | $\beta_0$                       | 5.02 (0.01),<br><0.001 | 5.05 (0.006),<br><0.001  | 5.08 (0.01),<br><0.001     | 5.08 (0.01),<br><0.001     | 5.08 (0.01),<br><0.001     |
| Age                                  | $\beta_1$                       |                        | 0.02 (0.0003),<br><0.001 | 0.02 (0.0003),<br><0.001   | 0.02 (0.0004),<br><0.001   | 0.02 (0.0004),<br><0.001   |
| Age <sup>2</sup>                     | $\beta_2$                       |                        |                          | -0.002 (0.0002),<br><0.001 | -0.001 (0.0002),<br><0.001 | -0.001 (0.0002),<br><0.001 |
| Variance of random intercept         | $\sigma^2 u_0$                  | 0.12 (0.003)           | 0.11 (0.003)             | 0.11 (0.003)               | 0.11 (0.003)               | 0.11 (0.003)               |
| Variance of random Age term          | $\sigma^2 u_1$                  |                        |                          |                            | 0.00006 (0.00001)          | 0.00006 (0.00001)          |
| AIC                                  |                                 | 25245.79               | 22857.62                 | 22737.6                    | 22480.27                   | 22408.66                   |
| Log Likelihood (P value for LR test) |                                 | -12619.9               | -11424.81<br>(<0.001)    | -11363.8<br>(<0.001)       | -11233.13<br>(<0.001)      | -11196.33<br>(<0.001)      |

**Model 1:** Unconditional mean

Level 1:  $FPG_{ij} = b_{0i} + e_{ij}$

Level 2:  $b_{0i} = \beta_0 + u_{0i}$

**Model 2:** Unconditional growth model

Level 1:  $FPG_{ij} = b_{0i} + b_{1i}Age_{ij} + e_{ij}$

Level 2:  $b_{0i} = \beta_0 + u_{0i}$

Level 2:  $b_{1i} = \beta_1$

**Model 3:** Quadratic unconditional growth model

Level 1:  $FPG_{ij} = b_{0i} + b_{1i}Age_{ij} + b_{2i}Age_{ij}^2 + e_{ij}$

Level 2:  $b_{0i} = \beta_0 + u_{0i}$

Level 2:  $b_{1i} = \beta_1$

Level 2:  $b_{2i} = \beta_2$

**Model 4:** Quadratic growth model with the intercept and slope variability

Level 1:  $FPG_{ij} = b_{0i} + b_{1i}Age_{ij} + b_{2i}Age_{ij}^2 + e_{ij}$

Level 2:  $b_{0i} = \beta_0 + u_{0i}$

Level 2:  $b_{1i} = \beta_1 + u_{1i}$

Level 2:  $b_{2i} = \beta_2$

**Final Model:** Was obtained with adding following error structure into Model 4:

**RCS:** Was not adjusted for residual correlation structure

**RH:**  $\sigma^2 \times e^{2\delta \times Age}$

In level 1 of growth models, change over time is modelled at individual-level, and in level 2, it is modelled at group-level.

$\beta_k$  represent population parameter or fixed effect;  $b_{ki}$  represent individual component or random effects;  $u_{ki}$  represents the deviation of  $b_{ki}$  from the value of  $\beta_k$  in the population for individual  $i$ .

Models 1 to 4 were developed without testing residual correlation structure and residual heteroscedasticity, and after reaching the optimal function, three commonly examined types of correlation and variance structure were tested to select the optimal error structure (**Final model**).

**AIC:** Akaike Information Criterion; **Log Likelihood** represents the maximum likelihood estimator of the parameter, and P value is a test of this difference using a likelihood ratio (LR) test; **RCS:** Residual correlation structure; **RH:** Residual heteroscedasticity;  $\sigma^2 \times e^{2\delta \times Age}$ : variance proportional to the exponential of Age multiplied by a constant

**Table S7.** Characteristics of different submodels and final growth model for systolic blood pressure (SBP) in men

|                                             | Notation       | Value (Standard Error), P value |                          |                          |                            |                            |                            |
|---------------------------------------------|----------------|---------------------------------|--------------------------|--------------------------|----------------------------|----------------------------|----------------------------|
|                                             |                | Model 1                         | Model 2                  | Model 3                  | Model 4                    | Model 5                    | Final model                |
| <b>Intercept</b>                            | $\beta_0$      | 118.69 (0.25),<br><0.001        | 118.55 (0.22),<br><0.001 | 117.60 (0.25),<br><0.001 | 117.33 (0.25),<br><0.001   | 117.32 (0.24),<br><0.001   | 117.26 (0.24),<br><0.001   |
| <b>Age</b>                                  | $\beta_1$      |                                 | 0.37 (0.01),<br><0.001   | 0.36 (0.01),<br><0.001   | 0.51 (0.01),<br><0.001     | 0.53 (0.01),<br><0.001     | 0.51 (0.02),<br><0.001     |
| <b>Age<sup>2</sup></b>                      | $\beta_2$      |                                 |                          | 0.04 (0.005),<br><0.001  | 0.08 (0.005),<br><0.001    | 0.07 (0.006),<br><0.001    | 0.08 (0.006),<br><0.001    |
| <b>Age<sup>3</sup></b>                      | $\beta_3$      |                                 |                          |                          | -0.006 (0.0005),<br><0.001 | -0.007 (0.0005),<br><0.001 | -0.006 (0.0006),<br><0.001 |
| <b>Variance of random intercept</b>         | $\sigma^2 u_0$ | 171.65 (4.99)                   | 137.06 (4.11)            | 134.71(4.04)             | 134.30 (4.02)              | 119.56 (3.91)              | 111.82 (3.99)              |
| <b>Variance of random Age term</b>          | $\sigma^2 u_1$ |                                 |                          |                          |                            | 0.10 (0.01)                | 0.09 (0.01)                |
| <b>AIC</b>                                  |                | 114402                          | 113437.6                 | 113362.5                 | 113225.7                   | 112871.2                   | 111807.3                   |
| <b>Log Likelihood (P value for LR test)</b> |                | -57197.98                       | -56714.80<br>(<0.001)    | -56676.24<br>(<0.001)    | -56606.84<br>(<0.001)      | -56427.58<br>(<0.001)      | -55893.63<br>(<0.001)      |

**Model 1:** Unconditional mean

Level 1:  $SBP_{ij} = b_{0i} + e_{ij}$

Level 2:  $b_{0i} = \beta_0 + u_{0i}$

**Model 2:** Unconditional growth model

Level 1:  $SBP_{ij} = b_{0i} + b_1 Age_{ij} + e_{ij}$

Level 2:  $b_{0i} = \beta_0 + u_{0i}$

Level 2:  $b_{1i} = \beta_1$

**Model 3:** Quadratic unconditional growth model

Level 1:  $SBP_{ij} = b_{0i} + b_1 Age_{ij} + b_2 Age_{ij}^2 + e_{ij}$

Level 2:  $b_{0i} = \beta_0 + u_{0i}$

Level 2:  $b_{1i} = \beta_1$

Level 2:  $b_{2i} = \beta_2$

**Model 4:** Cubic unconditional growth model

Level 1:  $SBP_{ij} = b_{0i} + b_1 Age_{ij} + b_2 Age_{ij}^2 + b_3 Age_{ij}^3 + e_{ij}$

Level 2:  $b_{0i} = \beta_0 + u_{0i}$

Level 2:  $b_{1i} = \beta_1$

Level 2:  $b_{2i} = \beta_2$

Level 2:  $b_{3i} = \beta_3$

**Model 5:** Cubic growth model with the intercept and slope variability

Level 1:  $SBP_{ij} = b_{0i} + b_1 Age_{ij} + b_2 Age_{ij}^2 + b_3 Age_{ij}^3 + e_{ij}$

Level 2:  $b_{0i} = \beta_0 + u_{0i}$

Level 2:  $b_{1i} = \beta_1 + u_{1i}$

Level 2:  $b_{2i} = \beta_2$

Level 2:  $b_{3i} = \beta_3$

**Final Model:** Was obtained with adding following error structure into Model 5:

**RCS:** First-Order Autoregressive

**RH:**  $\sigma^2 \times e^{2\delta \times Age}$

In level 1 of growth models, change over time is modelled at individual-level, and in level 2, it is modelled at group-level.

$\beta_k$  represent population parameter or fixed effect;  $b_{ki}$  represent individual component or random effects;  $u_{ki}$  represents the deviation of  $b_{ki}$  from the value of  $\beta_k$  in the population for individual  $i$ .

Models 1 to 5 were developed without testing residual correlation structure and residual heteroscedasticity, and after reaching the optimal function, three commonly examined types of correlation and variance structure were tested to select the optimal error structure (**Final model**).

**AIC:** Akaike Information Criterion; **Log Likelihood** represents the maximum likelihood estimator of the parameter, and P value is a test of this difference using a likelihood ratio (**LR**) test; **RCS:** Residual correlation structure; **RH:** Residual heteroscedasticity;  $\sigma^2 \times e^{2\delta \times Age}$ : variance proportional to the exponential of Age multiplied by a constant



**Table S8.** Characteristics of different submodels and final growth model for systolic blood pressure (SBP) in women

|                                             | Notation       | Value (Standard Error), P value |                          |                         |                            |                            |                            |
|---------------------------------------------|----------------|---------------------------------|--------------------------|-------------------------|----------------------------|----------------------------|----------------------------|
|                                             |                | Model 1                         | Model 2                  | Model 3                 | Model 4                    | Model 5                    | Final model                |
| <b>Intercept</b>                            | $\beta_0$      | 114.10 (0.23),<br><0.001        | 114.75 (0.19),<br><0.001 | 113.6 (0.21),<br><0.001 | 113.56 (0.21),<br><0.001   | 113.57 (0.21),<br><0.001   | 113.29 (0.21),<br><0.001   |
| <b>Age</b>                                  | $\beta_1$      |                                 | 0.44 (0.01),<br><0.001   | 0.45 (0.01),<br><0.001  | 0.64 (0.02),<br><0.001     | 0.65 (0.02),<br><0.001     | 0.65 (0.01),<br><0.001     |
| <b>Age<sup>2</sup></b>                      | $\beta_2$      |                                 |                          | 0.06 (0.005),<br><0.001 | 0.08 (0.005),<br><0.001    | 0.05 (0.005),<br><0.001    | 0.07 (0.006),<br><0.001    |
| <b>Age<sup>3</sup></b>                      | $\beta_3$      |                                 |                          |                         | -0.008 (0.0005),<br><0.001 | -0.008 (0.0005),<br><0.001 | -0.008 (0.0006),<br><0.001 |
| <b>Variance of random intercept</b>         | $\sigma^2 u_0$ | 203.22 (5.07)                   | 132.75 (3.68)            | 129.73 (3.59)           | 127.56 (3.51)              | 124.52 (3.70)              | 116.12 (3.75)              |
| <b>Variance of random Age term</b>          | $\sigma^2 u_1$ |                                 |                          |                         |                            | 0.07 (0.01)                | 0.09 (0.01)                |
| <b>AIC</b>                                  |                | 161219.3                        | 159815.5                 | 159670.3                | 159468.4                   | 158874.2                   | 157076.2                   |
| <b>Log Likelihood (P value for LR test)</b> |                | -80606.63                       | -79903.75<br>(<0.001)    | -79830.14<br>(<0.001)   | -79728.22<br>(<0.001)      | -79429.09<br>(<0.001)      | -78528.1<br>(<0.001)       |

**Model 1:** Unconditional mean

Level 1:  $SBP_{ij} = b_{0i} + e_{ij}$

Level 2:  $b_{0i} = \beta_0 + u_{0i}$

**Model 2:** Unconditional growth

model

Level 1:  $SBP_{ij} = b_{0i} + b_1 Age_{ij} + e_{ij}$

Level 2:  $b_{0i} = \beta_0 + u_{0i}$

Level 2:  $b_{1i} = \beta_1$

**Model 3:** Quadratic unconditional growth model

Level 1:  $SBP_{ij} = b_{0i} + b_1 Age_{ij} + b_2 Age_{ij}^2 + e_{ij}$

Level 2:  $b_{0i} = \beta_0 + u_{0i}$

Level 2:  $b_{1i} = \beta_1$

Level 2:  $b_{2i} = \beta_2$

**Model 4:** Cubic unconditional growth model

Level 1:  $SBP_{ij} = b_{0i} + b_1 Age_{ij} + b_2 Age_{ij}^2 +$

$b_3 Age_{ij}^3 + e_{ij}$

Level 2:  $b_{0i} = \beta_0 + u_{0i}$

Level 2:  $b_{1i} = \beta_1$

Level 2:  $b_{2i} = \beta_2$

Level 2:  $b_{3i} = \beta_3$

**Model 5:** Cubic growth model with the intercept and slope variability

Level 1:  $SBP_{ij} = b_{0i} + b_1 Age_{ij} + b_2 Age_{ij}^2 + b_3 Age_{ij}^3 + e_{ij}$

Level 2:  $b_{0i} = \beta_0 + u_{0i}$

Level 2:  $b_{1i} = \beta_1 + u_{1i}$

Level 2:  $b_{2i} = \beta_2$

Level 2:  $b_{3i} = \beta_3$

**Final Model:** Was obtained with adding following error structure into Model 5:

**RCS:** First-Order Autoregressive

**RH:**  $\sigma^2 \times e^{2\delta \times Age}$

In level 1 of growth models, change over time is modelled at individual-level, and in level 2, it is modelled at group-level.

$\beta_k$  represent population parameter or fixed effect;  $b_{ki}$  represent individual component or random effects;  $u_{ki}$  represents the deviation of  $b_{ki}$  from the value of  $\beta_k$  in the population for individual  $i$ .

Models 1 to 5 were developed without testing residual correlation structure and residual heteroscedasticity, and after reaching the optimal function, three commonly examined types of correlation and variance structure were tested to select the optimal error structure (**Final model**).

**AIC:** Akaike Information Criterion; **Log Likelihood** represents the maximum likelihood estimator of the parameter, and P value is a test of this difference using a likelihood ratio (**LR**) test; **RCS:** Residual correlation structure; **RH:** Residual heteroscedasticity;  $\sigma^2 \times e^{2\delta \times Age}$ : variance proportional to the exponential of Age multiplied by a constant

**Table S9.** Characteristics of different submodels and final growth model for diastolic blood pressure (DBP) in men

|                                      | Notation       | Value (Standard Error), P value |                         |                          |                           |                           |                            |
|--------------------------------------|----------------|---------------------------------|-------------------------|--------------------------|---------------------------|---------------------------|----------------------------|
|                                      |                | Model 1                         | Model 2                 | Model 3                  | Model 4                   | Model 5                   | Final model                |
| Intercept                            | $\beta_0$      | 77.81 (0.14),<br><0.001         | 77.75 (0.15),<br><0.001 | 79.47 (0.16),<br><0.001  | 79.42 (0.16),<br><0.001   | 79.44 (0.16),<br><0.001   | 79.45 (0.16),<br><0.001    |
| Age                                  | $\beta_1$      |                                 | 0.16 (0.01),<br><0.001  | 0.19 (0.01),<br><0.001   | 0.21 (0.01),<br><0.001    | 0.22 (0.01),<br><0.001    | 0.22 (0.01),<br><0.001     |
| Age <sup>2</sup>                     | $\beta_2$      |                                 |                         | -0.08 (0.003),<br><0.001 | -0.08 (0.004),<br><0.001  | -0.08 (0.004),<br><0.001  | -0.08 (0.004),<br><0.001   |
| Age <sup>3</sup>                     | $\beta_3$      |                                 |                         |                          | -0.001 (0.0003),<br>0.003 | -0.001 (0.0004),<br>0.004 | -0.001 (0.0004),<br><0.001 |
| Variance of random intercept         | $\sigma^2 u_0$ | 54.38 (1.71)                    | 56.99 (1.79)            | 55.05 (1.72)             | 55.25 (1.73)              | 52.28 (1.76)              | 52.25 (1.77)               |
| Variance of random Age term          | $\sigma^2 u_1$ |                                 |                         |                          |                           | 0.02 (0.005)              | 0.02 (0.005)               |
| AIC                                  |                | 103769.1                        | 103387.8                | 102867.2                 | 102860.4                  | 102809.7                  | 102778.1                   |
| Log Likelihood (P value for LR test) |                | -51881.53                       | -51689.89<br>(<0001)    | -51428.62<br>(<0001)     | -51424.20<br>(0.002)      | -51396.86<br>(<0001)      | -51380.04<br>(<0001)       |

**Model 1:** Unconditional mean

Level 1:  $DBP_{ij} = b_{0i} + e_{ij}$

Level 2:  $b_{0i} = \beta_0 + u_{0i}$

**Model 2:** Unconditional growth model

Level 1:  $DBP_{ij} = b_{0i} + b_1 Age_{ij} + e_{ij}$

Level 2:  $b_{0i} = \beta_0 + u_{0i}$

Level 2:  $b_{1i} = \beta_1$

**Model 3:** Quadratic unconditional growth model

Level 1:  $DBP_{ij} = b_{0i} + b_1 Age_{ij} + b_2 Age_{ij}^2 + e_{ij}$

Level 2:  $b_{0i} = \beta_0 + u_{0i}$

Level 2:  $b_{1i} = \beta_1$

Level 2:  $b_{2i} = \beta_2$

**Model 4:** Cubic unconditional growth model

Level 1:  $DBP_{ij} = b_{0i} + b_1 Age_{ij} + b_2 Age_{ij}^2 +$

$b_3 Age_{ij}^3 + e_{ij}$

Level 2:  $b_{0i} = \beta_0 + u_{0i}$

Level 2:  $b_{1i} = \beta_1$

Level 2:  $b_{2i} = \beta_2$

Level 2:  $b_{3i} = \beta_3$

**Model 5:** Cubic growth model with the intercept and slope variability

Level 1:  $DBP_{ij} = b_{0i} + b_1 Age_{ij} + b_2 Age_{ij}^2 + b_3 Age_{ij}^3 + e_{ij}$

Level 2:  $b_{0i} = \beta_0 + u_{0i}$

Level 2:  $b_{1i} = \beta_1 + u_{1i}$

Level 2:  $b_{2i} = \beta_2$

Level 2:  $b_{3i} = \beta_3$

**Final Model:** Was obtained with adding following error structure into Model 5:

**RCS:** Was not adjusted for residual correlation structure

**RH:**  $\sigma^2 \times e^{2\delta \times Age}$

In level 1 of growth models, change over time is modelled at individual-level, and in level 2, it is modelled at group-level.

$\beta_k$  represent population parameter or fixed effect;  $b_{ki}$  represent individual component or random effects;  $u_{ki}$  represents the deviation of  $b_{ki}$  from the value of  $\beta_k$  in the population for individual  $i$ .

Models 1 to 5 were developed without testing residual correlation structure and residual heteroscedasticity, and after reaching the optimal function, three commonly examined types of correlation and variance structure were tested to select the optimal error structure (**Final model**).

**AIC:** Akaike Information Criterion; **Log Likelihood** represents the maximum likelihood estimator of the parameter, and P value is a test of this difference using a likelihood ratio (**LR**) test; **RCS:** Residual correlation structure; **RH:** Residual heteroscedasticity;  $\sigma^2 \times e^{2\delta \times Age}$ : variance proportional to the exponential of Age multiplied by a constant

**Table S10.** Characteristics of different submodels and final growth model for diastolic blood pressure (DBP) in women

|                                      |                | Value (Standard Error), P value |                         |                          |                            |                            |                            |
|--------------------------------------|----------------|---------------------------------|-------------------------|--------------------------|----------------------------|----------------------------|----------------------------|
|                                      | Notation       | Model 1                         | Model 2                 | Model 3                  | Model 4                    | Model 5                    | Final model                |
| Intercept                            | $\beta_0$      | 75.10 (0.12),<br><0.001         | 75.36 (0.11),<br><0.001 | 76.14 (0.13),<br><0.001  | 76.12 (0.13),<br><0.001    | 76.14 (0.13),<br><0.001    | 76.13 (0.13),<br><0.001    |
| Age                                  | $\beta_1$      |                                 | 0.17 (0.006),<br><0.001 | 0.17 (0.006),<br><0.001  | 0.24 (0.01),<br><0.001     | 0.26 (0.01),<br><0.001     | 0.26 (0.01),<br><0.001     |
| Age <sup>2</sup>                     | $\beta_2$      |                                 |                         | -0.04 (0.003),<br><0.001 | -0.04 (0.01),<br><0.001    | -0.04 (0.003),<br><0.001   | -0.04 (0.003),<br><0.001   |
| Age <sup>3</sup>                     | $\beta_3$      |                                 |                         |                          | -0.003 (0.0004),<br><0.001 | -0.003 (0.0004),<br><0.001 | -0.004 (0.0004),<br><0.001 |
| Variance of random intercept         | $\sigma^2 u_0$ | 53.77 (1.45)                    | 46.51 (1.29)            | 45.82 (1.28)             | 45.56 (1.27)               | 44.62 (1.36)               | 44.45 (1.37)               |
| Variance of random Age term          | $\sigma^2 u_1$ |                                 |                         |                          |                            | 0.02 (0.004)               | 0.02 (0.004)               |
| AIC                                  |                | 143780.1                        | 143154.4                | 142991.5                 | 142919.4                   | 142809.6                   | 142651.2                   |
| Log Likelihood (P value for LR test) |                | -71887.06                       | -71573.22<br>(<0.001)   | -71490.75<br>(<0.001)    | -71453.7<br>(<0.001)       | -71396.8<br>(<0.001)       | -71316.63<br>(<0.001)      |

**Model 1:** Unconditional mean

Level 1:  $DBP_{ij} = b_{0i} + e_{ij}$

Level 2:  $b_{0i} = \beta_0 + u_{0i}$

**Model 2:** Unconditional growth model

Level 1:  $DBP_{ij} = b_{0i} + b_1 Age_{ij} + e_{ij}$

Level 2:  $b_{0i} = \beta_0 + u_{0i}$

Level 2:  $b_{1i} = \beta_1$

**Model 3:** Quadratic unconditional growth model

Level 1:  $DBP_{ij} = b_{0i} + b_1 Age_{ij} + b_2 Age_{ij}^2 + e_{ij}$

Level 2:  $b_{0i} = \beta_0 + u_{0i}$

Level 2:  $b_{1i} = \beta_1$

Level 2:  $b_{2i} = \beta_2$

**Model 4:** Cubic unconditional growth model

Level 1:  $DBP_{ij} = b_{0i} + b_1 Age_{ij} + b_2 Age_{ij}^2 + b_3 Age_{ij}^3 + e_{ij}$

Level 2:  $b_{0i} = \beta_0 + u_{0i}$

Level 2:  $b_{1i} = \beta_1$

Level 2:  $b_{2i} = \beta_2$

Level 2:  $b_{3i} = \beta_3$

**Model 5:** Cubic growth model with the intercept and slope variability

Level 1:  $DBP_{ij} = b_{0i} + b_1 Age_{ij} + b_2 Age_{ij}^2 + b_3 Age_{ij}^3 + e_{ij}$

Level 2:  $b_{0i} = \beta_0 + u_{0i}$

Level 2:  $b_{1i} = \beta_1 + u_{1i}$

Level 2:  $b_{2i} = \beta_2$

Level 2:  $b_{3i} = \beta_3$

**Final Model:** Was obtained with adding following error structure into Model 5:

**RCS:** Was not adjusted for residual correlation structure

**RH:**  $\sigma^2 \times e^{2\delta \times Age}$

In level 1 of growth models, change over time is modelled at individual-level, and in level 2, it is modelled at group-level.

$\beta_k$  represent population parameter or fixed effect;  $b_{ki}$  represent individual component or random effects;  $u_{ki}$  represents the deviation of  $b_{ki}$  from the value of  $\beta_k$  in the population for individual  $i$ .

Models 1 to 5 were developed without testing residual correlation structure and residual heteroscedasticity, and after reaching the optimal function, three commonly examined types of correlation and variance structure were tested to select the optimal error structure (**Final model**).

**AIC:** Akaike Information Criterion; **Log Likelihood** represents the maximum likelihood estimator of the parameter, and P value is a test of this difference using a likelihood ratio (**LR**) test; **RCS:** Residual correlation structure; **RH:** Residual heteroscedasticity;  $\sigma^2 \times e^{2\delta \times Age}$ : Variance proportional to the exponential of Age multiplied by a constant

**Table S11.** Characteristics of different submodels and final growth model for high density lipoprotein cholesterol (HDL-C) in men

| Value (Standard Error), P value                                                                                                                                                                                                                                                                                                                                               |                |                                                                                                                                                                                                                                                      |                           |                                                                                                                                                                                                                                                                                                                                                            |                          |                          |
|-------------------------------------------------------------------------------------------------------------------------------------------------------------------------------------------------------------------------------------------------------------------------------------------------------------------------------------------------------------------------------|----------------|------------------------------------------------------------------------------------------------------------------------------------------------------------------------------------------------------------------------------------------------------|---------------------------|------------------------------------------------------------------------------------------------------------------------------------------------------------------------------------------------------------------------------------------------------------------------------------------------------------------------------------------------------------|--------------------------|--------------------------|
|                                                                                                                                                                                                                                                                                                                                                                               | Notation       | Model 1                                                                                                                                                                                                                                              | Model 2                   | Model 3                                                                                                                                                                                                                                                                                                                                                    | Model 4                  | Final model              |
| Intercept                                                                                                                                                                                                                                                                                                                                                                     | $\beta_0$      | 1.03 (0.004),<br><0.001                                                                                                                                                                                                                              | 1.03 (0.003),<br><0.001   | 1.02 (0.004),<br><0.001                                                                                                                                                                                                                                                                                                                                    | 1.02 (0.004),<br><0.001  | 1.02 (0.004),<br><0.001  |
| Age                                                                                                                                                                                                                                                                                                                                                                           | $\beta_1$      |                                                                                                                                                                                                                                                      | 0.007 (0.0001),<br><0.001 | 0.01 (0.0001),<br><0.001                                                                                                                                                                                                                                                                                                                                   | 0.01 (0.0002),<br><0.001 | 0.01 (0.0002),<br><0.001 |
| Age <sup>2</sup>                                                                                                                                                                                                                                                                                                                                                              | $\beta_2$      |                                                                                                                                                                                                                                                      |                           | 0.001(0.0001),<br><0.001                                                                                                                                                                                                                                                                                                                                   | 0.001(0.0001),<br><0.001 | 0.001(0.0001),<br><0.001 |
| Variance of random intercept                                                                                                                                                                                                                                                                                                                                                  | $\sigma^2 u_0$ | 0.04 (0.001)                                                                                                                                                                                                                                         | 0.04 (0.001)              | 0.04 (0.001)                                                                                                                                                                                                                                                                                                                                               | 0.04 (0.001)             | 0.03 (0.001)             |
| Variance of random Age term                                                                                                                                                                                                                                                                                                                                                   | $\sigma^2 u_1$ |                                                                                                                                                                                                                                                      |                           |                                                                                                                                                                                                                                                                                                                                                            | 0.00002 (0.000003)       | 0.000004(0.000003)       |
| AIC                                                                                                                                                                                                                                                                                                                                                                           |                | -4891.253                                                                                                                                                                                                                                            | -6431.502                 | -6489.027                                                                                                                                                                                                                                                                                                                                                  | -6626.129                | -6823.337                |
| Log Likelihood (P value for LR test)                                                                                                                                                                                                                                                                                                                                          |                | 2448.627                                                                                                                                                                                                                                             | 3219.751<br><0.001        | 3249.513<br><0.001                                                                                                                                                                                                                                                                                                                                         | 3320.065<br><0.001       | 3420.668<br><0.001       |
| Model 1: Unconditional mean<br>Level 1: HDL <sub>ij</sub> = b <sub>oi</sub> + e <sub>ij</sub><br>Level 2: b <sub>oi</sub> = β <sub>0</sub> + u <sub>oi</sub>                                                                                                                                                                                                                  |                | Model 2: Unconditional growth model<br>Level 1: HDL <sub>ij</sub> = b <sub>oi</sub> + b <sub>1</sub> Age <sub>ij</sub> + e <sub>ij</sub><br>Level 2: b <sub>oi</sub> = β <sub>0</sub> + u <sub>oi</sub><br>Level 2: b <sub>1i</sub> = β <sub>1</sub> |                           | Model 3: Quadratic unconditional growth model<br>Level 1: DBP <sub>ij</sub> = b <sub>oi</sub> + b <sub>1</sub> Age <sub>ij</sub> + b <sub>2</sub> Age <sup>2</sup> <sub>ij</sub> +e <sub>ij</sub><br>Level 2: b <sub>oi</sub> = β <sub>0</sub> + u <sub>oi</sub><br>Level 2: b <sub>1i</sub> = β <sub>1</sub><br>Level 2: b <sub>2i</sub> = β <sub>2</sub> |                          |                          |
| Model 4: Quadratic unconditional growth model<br>Level 1: DBP <sub>ij</sub> = b <sub>oi</sub> + b <sub>1</sub> Age <sub>ij</sub> + b <sub>2</sub> Age <sup>2</sup> <sub>ij</sub> + e <sub>ij</sub><br>Level 2: b <sub>oi</sub> = β <sub>0</sub> + u <sub>oi</sub><br>Level 2: b <sub>1i</sub> = β <sub>1</sub> + u <sub>1i</sub><br>Level 2: b <sub>2i</sub> = β <sub>2</sub> |                | Final Model: Was obtained with adding following error structure into Model 4:<br>RCS: First-Order Autoregressive<br>RH: σ <sup>2</sup> × Age  <sup>2δ</sup>                                                                                          |                           |                                                                                                                                                                                                                                                                                                                                                            |                          |                          |

In level 1 of growth models, change over time is modelled at individual-level, and in level 2, it is modelled at group-level.

$\beta_k$  represent population parameter or fixed effect;  $b_{ki}$  represent individual component or random effects;  $u_{ki}$  represents the deviation of  $b_{ki}$  from the value of  $\beta_k$  in the population for individual  $i$ .

Models 1 to 4 were developed without testing residual correlation structure and residual heteroscedasticity, and after reaching the optimal function, three commonly examined types of correlation and variance structure were tested to select the optimal error structure (**Final model**).

**AIC:** Akaike Information Criterion; **Log Likelihood** represents the maximum likelihood estimator of the parameter, and P value is a test of this difference using a likelihood ratio (**LR**) test; **RCS:** Residual correlation structure; **RH:** Residual heteroscedasticity;  $\sigma^2 \times |Age|^{2\delta}$ : Variance proportional to the absolute value of Age raised to a constant power

**Table S12.** Characteristics of different submodels and final growth model for high density lipoprotein cholesterol (HDL-C) in women

|                                             | Notation       | Value (Standard Error), P value |                           |                             |                            |                            |
|---------------------------------------------|----------------|---------------------------------|---------------------------|-----------------------------|----------------------------|----------------------------|
|                                             |                | Model 1                         | Model 2                   | Model 3                     | Model 4                    | Final model                |
| <b>Intercept</b>                            | $\beta_0$      | 1.24 (0.004),<br><0.001         | 1.25 (0.004),<br><0.001   | 1.25 (0.004),<br><0.001     | 1.26 (0.004),<br><0.001    | 1.26 (0.005),<br><0.001    |
| <b>Age</b>                                  | $\beta_1$      |                                 | 0.009 (0.0002),<br><0.001 | 0.009 (0.0002),<br><0.001   | 0.01 (0.0002),<br><0.001   | 0.01 (0.0002),<br><0.001   |
| <b>Age<sup>2</sup></b>                      | $\beta_2$      |                                 |                           | 0.00006 (0.00009),<br>0.516 | 0.0005 (0.0001),<br><0.001 | 0.0005 (0.0001),<br><0.001 |
| <b>Variance of random intercept</b>         | $\sigma^2 u_0$ | 0.05 (0.001)                    | 0.07 (0.001)              | 0.07 (0.001)                | 0.07 (0.002)               | 0.07 (0.002)               |
| <b>Variance of random Age term</b>          | $\sigma^2 u_1$ |                                 |                           |                             | 0.00003 (0.000004)         | 0.00003 (0.000005)         |
| <b>AIC</b>                                  |                | 1814.589                        | -86.87082                 | -109.4839                   | -203.3837                  | -210.0115                  |
| <b>Log Likelihood (P value for LR test)</b> |                | -904.2946                       | 47.43541<br>(<0.001)      | 59.74194<br>(<0.001)        | 108.69188<br>(<0.001)      | 113.0058<br>(0.003)        |

**Model 1:** Unconditional mean

Level 1: HDL-C<sub>ij</sub> =  $b_{0i}$  +  $e_{ij}$

Level 2:  $b_{0i}$  =  $\beta_0$  +  $u_{0i}$

**Model 2:** Unconditional growth model

Level 1: HDL-C<sub>ij</sub> =  $b_{0i}$  +  $b_1 \text{Age}_{ij}$  +  $e_{ij}$

Level 2:  $b_{0i}$  =  $\beta_0$  +  $u_{0i}$

Level 2:  $b_{1i}$  =  $\beta_1$

**Model 3:** Quadratic unconditional growth model

Level 1: HDL-C<sub>ij</sub> =  $b_{0i}$  +  $b_1 \text{Age}_{ij}$  +  $b_2 \text{Age}_{ij}^2$  +  $e_{ij}$

Level 2:  $b_{0i}$  =  $\beta_0$  +  $u_{0i}$

Level 2:  $b_{1i}$  =  $\beta_1$

Level 2:  $b_{2i}$  =  $\beta_2$

**Model 4:** Quadratic unconditional growth model

Level 1: HDL-C<sub>ij</sub> =  $b_{0i}$  +  $b_1 \text{Age}_{ij}$  +  $b_2 \text{Age}_{ij}^2$  +  $e_{ij}$

Level 2:  $b_{0i}$  =  $\beta_0$  +  $u_{0i}$

Level 2:  $b_{1i}$  =  $\beta_1$  +  $u_{1i}$

Level 2:  $b_{2i}$  =  $\beta_2$

**Final Model:** Was obtained with adding following error structure into Model 4:

**RCS:** Was not adjusted for residual correlation structure

**RH:**  $\sigma^2 \times |\text{Age}|^{2\delta}$

In level 1 of growth models, change over time is modelled at individual-level, and in level 2, it is modelled at group-level.

$\beta_k$  represent population parameter or fixed effect;  $b_{ki}$  represent individual component or random effects;  $u_{ki}$  represents the deviation of  $b_{ki}$  from the value of  $\beta_k$  in the population for individual  $i$ .

Models 1 to 4 were developed without testing residual correlation structure and residual heteroscedasticity, and after reaching the optimal function, three commonly examined types of correlation and variance structure were tested to select the optimal error structure (**Final model**).

**AIC:** Akaike Information Criterion; **Log Likelihood** represents the maximum likelihood estimator of the parameter, and P value is a test of this difference using a likelihood ratio (**LR**) test; **RCS:** Residual correlation structure; **RH:** Residual heteroscedasticity;  $\sigma^2 \times |\text{Age}|^{2\delta}$ : Variance proportional to the absolute value of Age raised to a constant power

**Table S13.** Characteristics of different submodels and final growth model for total cholesterol (TC) in men

|                                             | Notation       | Value (Standard Error), P value |                            |                            |                             |                             |
|---------------------------------------------|----------------|---------------------------------|----------------------------|----------------------------|-----------------------------|-----------------------------|
|                                             |                | Model 1                         | Model 2                    | Model 3                    | Model 4                     | Final model                 |
| <b>Intercept</b>                            | $\beta_0$      | 4.98 (0.01),<br><0.001          | 4.98 (0.01),<br><0.001     | 5.14 (0.02),<br><0.001     | 5.15 (0.02),<br><0.001      | 5.17 (0.02),<br><0.001      |
| <b>Age</b>                                  | $\beta_1$      |                                 | -0.003 (0.0007),<br><0.001 | -0.0005(0.0007),<br>0.476  | -0.004 (0.001),<br><0.001   | -0.003 (0.001),<br>0.036    |
| <b>Age<sup>2</sup></b>                      | $\beta_2$      |                                 |                            | -0.008 (0.0003),<br><0.001 | -0.008 (0.0004),<br><0.001  | -0.008 (0.0004),<br><0.001  |
| <b>Age<sup>3</sup></b>                      | $\beta_3$      |                                 |                            |                            | 0.0001 (0.00003),<br><0.001 | 0.0001 (0.00004),<br><0.001 |
| <b>Variance of random intercept</b>         | $\sigma^2 u_0$ | 0.62 (0.02)                     | 0.63 (0.02)                | 0.64 (0.02)                | 0.64 (0.02)                 | 0.62 (0.02)                 |
| <b>AIC</b>                                  |                | 33991.55                        | 33974.32                   | 33454.35                   | 33405.58                    | 32981.21                    |
| <b>Log Likelihood (P value for LR test)</b> |                | -16992.77                       | -16983.16<br>(<0.001)      | -16722.17<br>(<0.001)      | -16696.79<br>(<0.001)       | -16469.61<br>(<0.001)       |

**Model 1:** Unconditional mean

Level 1:  $TC_{ij} = b_{0i} + e_{ij}$

Level 2:  $b_{0i} = \beta_0 + u_{0i}$

**Model 2:** Unconditional growth model

Level 1:  $TC_{ij} = b_{0i} + b_1 Age_{ij} + e_{ij}$

Level 2:  $b_{0i} = \beta_0 + u_{0i}$

Level 2:  $b_{1i} = \beta_1$

**Model 3:** Quadratic unconditional growth model

Level 1:  $TC_{ij} = b_{0i} + b_1 Age_{ij} + b_2 Age_{ij}^2 + e_{ij}$

Level 2:  $b_{0i} = \beta_0 + u_{0i}$

Level 2:  $b_{1i} = \beta_1$

Level 2:  $b_{2i} = \beta_2$

**Model 4:** Cubic unconditional growth model

Level 1:  $TC_{ij} = b_{0i} + b_1 Age_{ij} + b_2 Age_{ij}^2 + b_3 Age_{ij}^3 + e_{ij}$

Level 2:  $b_{0i} = \beta_0 + u_{0i}$

Level 2:  $b_{1i} = \beta_1$

Level 2:  $b_{2i} = \beta_2$

Level 2:  $b_{3i} = \beta_3$

**Final Model:** Was obtained with adding following error structure into Model 4:

**RCS:** General correlation structure

**RH:** Was not adjusted for variance structure

In level 1 of growth models, change over time is modelled at individual-level, and in level 2, it is modelled at group-level.

$\beta_k$  represent population parameter or fixed effect;  $b_{ki}$  represent individual component or random effects;  $u_{ki}$  represents the deviation of  $b_{ki}$  from the value of  $\beta_k$  in the population for individual  $i$ .

Models 1 to 4 were developed without testing residual correlation structure and residual heteroscedasticity, and after reaching the optimal function, three commonly examined types of correlation and variance structure were tested to select the optimal error structure (**Final model**).

**AIC:** Akaike Information Criterion; **Log Likelihood** represents the maximum likelihood estimator of the parameter, and P value is a test of this difference using a likelihood ratio (**LR**) test; **RCS:** Residual correlation structure; **RH:** Residual heteroscedasticity

**Table S14.** Characteristics of different submodels and final growth model for total cholesterol (TC) in women

|                                      |                | Value (Standard Error), P value |                         |                           |                             |                             |                             |
|--------------------------------------|----------------|---------------------------------|-------------------------|---------------------------|-----------------------------|-----------------------------|-----------------------------|
|                                      | Notation       | Model 1                         | Model 2                 | Model 3                   | Model 4                     | Model 5                     | Final model                 |
| Intercept                            | $\beta_0$      | 5.11 (0.01),<br><0.001          | 5.13 (0.01),<br><0.001  | 5.27 (0.01),<br><0.001    | 5.27 (0.01),<br><0.001      | 5.27 (0.01),<br><0.001      | 5.26 (0.01),<br><0.001      |
| Age                                  | $\beta_1$      |                                 | 0.01 (0.001),<br><0.001 | 0.01 (0.001),<br><0.001   | 0.03 (0.001),<br><0.001     | 0.03 (0.001),<br><0.001     | 0.03 (0.001),<br><0.001     |
| Age <sup>2</sup>                     | $\beta_2$      |                                 |                         | -0.01 (0.0003),<br><0.001 | -0.01 (0.0003),<br><0.001   | -0.01 (0.0003),<br><0.001   | -0.005 (0.0004),<br><0.001  |
| Age <sup>3</sup>                     | $\beta_3$      |                                 |                         |                           | -0.001 (0.00003),<br><0.001 | -0.001 (0.00003),<br><0.001 | -0.001 (0.00004),<br><0.001 |
| Variance of random intercept         | $\sigma^2 u_0$ | 0.66 (0.02)                     | 0.55 (0.01)             | 0.57 (0.01)               | 0.56 (0.01)                 | 0.51 (0.01)                 | 0.46 (0.01)                 |
| Variance of random Age term          | $\sigma^2 u_1$ |                                 |                         |                           |                             | 0.0007(0.00006)             | 0.0003 (0.00006)            |
| AIC                                  |                | 49834.05                        | 49513.67                | 48964.68                  | 48623.72                    | 48434.96                    | 47594.15                    |
| Log Likelihood (P value for LR test) |                | -24914.03                       | -24752.84<br>(<0.001)   | -24477.34<br>(<0.001)     | -24305.86<br>(<0.001)       | -24209.48<br>(<0.001)       | -23787.08<br>(<0.001)       |

**Model 1:** Unconditional mean

Level 1:  $TC_{ij} = b_{0i} + e_{ij}$

Level 2:  $b_{0i} = \beta_0 + u_{0i}$

**Model 2:** Unconditional growth model

Level 1:  $TC_{ij} = b_{0i} + b_1 Age_{ij} + e_{ij}$

Level 2:  $b_{0i} = \beta_0 + u_{0i}$

Level 2:  $b_{1i} = \beta_1$

**Model 3:** Quadratic unconditional growth model

Level 1:  $TC_{ij} = b_{0i} + b_1 Age_{ij} + b_2 Age_{ij}^2 + e_{ij}$

Level 2:  $b_{0i} = \beta_0 + u_{0i}$

Level 2:  $b_{1i} = \beta_1$

Level 2:  $b_{2i} = \beta_2$

**Model 4:** Cubic unconditional growth model

Level 1:  $TC_{ij} = b_{0i} + b_1 Age_{ij} + b_2 Age_{ij}^2 + b_3 Age_{ij}^3 + e_{ij}$

Level 2:  $b_{0i} = \beta_0 + u_{0i}$

Level 2:  $b_{1i} = \beta_1$

Level 2:  $b_{2i} = \beta_2$

Level 2:  $b_{3i} = \beta_3$

**Model 5:** Cubic growth model with the intercept and slope variability

Level 1:  $TC_{ij} = b_{0i} + b_1 Age_{ij} + b_2 Age_{ij}^2 + b_3 Age_{ij}^3 + e_{ij}$

Level 2:  $b_{0i} = \beta_0 + u_{0i}$

Level 2:  $b_{1i} = \beta_1 + u_{1i}$

Level 2:  $b_{2i} = \beta_2$

Level 2:  $b_{3i} = \beta_3$

**Final Model:** Was obtained with adding following error structure into Model 5:

**RCS:** First-Order

Autoregressive

**RH:**  $\sigma^2 \times e^{2\delta \times Age}$

In level 1 of growth models, change over time is modelled at individual-level, and in level 2, it is modelled at group-level.

$\beta_k$  represent population parameter or fixed effect;  $b_{ki}$  represent individual component or random effects;  $u_{ki}$  represents the deviation of  $b_{ki}$  from the value of  $\beta_k$  in the population for individual  $i$ .

Models 1 to 5 were developed without testing residual correlation structure and residual heteroscedasticity, and after reaching the optimal function, three commonly examined types of correlation and variance structure were tested to select the optimal error structure (**Final model**).

**AIC:** Akaike Information Criterion; **Log Likelihood** represents the maximum likelihood estimator of the parameter, and P value is a test of this difference using a likelihood ratio (**LR**) test; **RCS:** Residual correlation structure; **RH:** Residual heteroscedasticity;  $\sigma^2 \times e^{2\delta \times Age}$ : Variance proportional to the exponential of Age multiplied by a constant

**Table S15.** Characteristics of different submodels and final growth model natural logarithm of triglyceride (Ln-TG) in men

|                                      | Notation       | Value (Standard Error), P value |                            |                            |                             |                             |                             |
|--------------------------------------|----------------|---------------------------------|----------------------------|----------------------------|-----------------------------|-----------------------------|-----------------------------|
|                                      |                | Model 1                         | Model 2                    | Model 3                    | Model 4                     | Model 5                     | Final model                 |
| Intercept                            | $\beta_0$      | 0.48 (0.01),<br><0.001          | 0.47 (0.01),<br><0.001     | 0.57 (0.01),<br><0.001     | 0.57 (0.01),<br><0.001      | 0.57 (0.01),<br><0.001      | 0.57 (0.01),<br><0.001      |
| Age                                  | $\beta_1$      |                                 | -0.002 (0.0004),<br><0.001 | -0.001 (0.0004),<br><0.01  | -0.005 (0.0005),<br><0.001  | -0.004 (0.0006),<br><0.001  | -0.004 (0.0006),<br><0.001  |
| Age <sup>2</sup>                     | $\beta_2$      |                                 |                            | -0.004 (0.0002),<br><0.001 | -0.004 (0.0002),<br><0.001  | -0.004 (0.0002),<br><0.001  | -0.005 (0.0002),<br><0.001  |
| Age <sup>3</sup>                     | $\beta_3$      |                                 |                            |                            | 0.0001 (0.00002),<br><0.001 | 0.0001 (0.00002),<br><0.001 | 0.0001 (0.00002),<br><0.001 |
| Variance of random intercept         | $\sigma^2 u_0$ | 0.17 (0.005)                    | 0.17 (0.005)               | 0.17 (0.005)               | 0.17 (0.005)                | 0.17 (0.005)                | 0.16 (0.005)                |
| Variance of random Age term          | $\sigma^2 u_1$ |                                 |                            |                            |                             | 0.00009 (0.00001)           | 0.00002 (0.00001)           |
| AIC                                  |                | 13657.48                        | 13619.7                    | 13007.22                   | 12938.91                    | 12840.78                    | 12600.77                    |
| Log Likelihood (P value for LR test) |                | -6825.74                        | -6805.85<br>(<0.001)       | -6498.609<br>(<0.001)      | -6463.453<br>(<0.001)       | -6412.392<br>(<0.001)       | -6290.387<br>(<0.001)       |

**Model 1:** Unconditional mean

Level 1:  $TC_{ij} = b_{0i} + e_{ij}$

Level 2:  $b_{0i} = \beta_0 + u_{0i}$

**Model 2:** Unconditional growth model

Level 1:  $TC_{ij} = b_{0i} + b_1 Age_{ij} + e_{ij}$

Level 2:  $b_{0i} = \beta_0 + u_{0i}$

Level 2:  $b_{1i} = \beta_1$

**Model 3:** Quadratic unconditional growth model

Level 1:  $TC_{ij} = b_{0i} + b_1 Age_{ij} + b_2 Age_{ij}^2 + e_{ij}$

Level 2:  $b_{0i} = \beta_0 + u_{0i}$

Level 2:  $b_{1i} = \beta_1$

Level 2:  $b_{2i} = \beta_2$

**Model 4:** Cubic unconditional growth model

Level 1:  $TC_{ij} = b_{0i} + b_1 Age_{ij} + b_2 Age_{ij}^2 + b_3 Age_{ij}^3 + e_{ij}$

Level 2:  $b_{0i} = \beta_0 + u_{0i}$

Level 2:  $b_{1i} = \beta_1$

Level 2:  $b_{2i} = \beta_2$

Level 2:  $b_{3i} = \beta_3$

**Model 5:** Cubic growth model with the intercept and slope variability

Level 1:  $TC_{ij} = b_{0i} + b_1 Age_{ij} + b_2 Age_{ij}^2 + b_3 Age_{ij}^3 + e_{ij}$

Level 2:  $b_{0i} = \beta_0 + u_{0i}$

Level 2:  $b_{1i} = \beta_1 + u_{1i}$

Level 2:  $b_{2i} = \beta_2$

Level 2:  $b_{3i} = \beta_3$

**Final Model:** Was obtained with adding following error structure into Model 5:

**RCS:** First-Order

Autoregressive

**RH:**  $\sigma^2 \times e^{2\delta \times Age}$

In level 1 of growth models, change over time is modelled at individual-level, and in level 2, it is modelled at group-level.

$\beta_k$  represent population parameter or fixed effect;  $b_{ki}$  represent individual component or random effects;  $u_{ki}$  represents the deviation of  $b_{ki}$  from the value of  $\beta_k$  in the population for individual  $i$ .

Models 1 to 5 were developed without testing residual correlation structure and residual heteroscedasticity, and after reaching the optimal function, three commonly examined types of correlation and variance structure were tested to select the optimal error structure (**Final model**).

**AIC:** Akaike Information Criterion; **Log Likelihood** represents the maximum likelihood estimator of the parameter, and P value is a test of this difference using a likelihood ratio (**LR**) test; **RCS:** Residual correlation structure; **RH:** Residual heteroscedasticity;  $\sigma^2 \times e^{2\delta \times Age}$ : Variance proportional to the exponential of Age multiplied by a constant



**Table S16.** Characteristics of different submodels and final growth model natural logarithm of triglyceride (Ln-TG) in women

|                                             | Notation       | Value (Standard Error), P value |                           |                            |                              |                              |                              |
|---------------------------------------------|----------------|---------------------------------|---------------------------|----------------------------|------------------------------|------------------------------|------------------------------|
|                                             |                | Model 1                         | Model 2                   | Model 3                    | Model 4                      | Model 5                      | Final model                  |
| <b>Intercept</b>                            | $\beta_0$      | 0.32 (0.01),<br><0.001          | 0.33 (0.01),<br><0.001    | 0.38 (0.01),<br><0.001     | 0.38 (0.01),<br><0.001       | 0.38 (0.01),<br><0.001       | 0.39 (0.01),<br><0.001       |
| <b>Age</b>                                  | $\beta_1$      |                                 | 0.003 (0.0003),<br><0.001 | 0.004 (0.0003),<br><0.001  | 0.01 (0.0004),<br><0.001     | 0.01 (0.0004),<br><0.001     | 0.01 (0.0005),<br><0.001     |
| <b>Age<sup>2</sup></b>                      | $\beta_2$      |                                 |                           | -0.003 (0.0001),<br><0.001 | -0.003 (0.0001),<br><0.001   | -0.002 (0.0001),<br><0.001   | -0.003 (0.0001),<br><0.001   |
| <b>Age<sup>3</sup></b>                      | $\beta_3$      |                                 |                           |                            | -0.0001 (0.00001),<br><0.001 | -0.0001 (0.00001),<br><0.001 | -0.0001 (0.00001),<br><0.001 |
| <b>Variance of random intercept</b>         | $\sigma^2 u_0$ | 0.16 (0.004)                    | 0.15 (0.003)              | 0.15 (0.004)               | 0.15 (0.004)                 | 0.15 (0.004)                 | 0.14 (0.003)                 |
| <b>Variance of random Age term</b>          | $\sigma^2 u_1$ |                                 |                           |                            |                              | 0.00005 (0.00001)            | 0.00005 (0.00001)            |
| <b>AIC</b>                                  |                | 17363.1                         | 17143.56                  | 16738.47                   | 16666.37                     | 16627.17                     | 16474.67                     |
| <b>Log Likelihood (P value for LR test)</b> |                | -8678.548                       | -8567.78<br>(<0.001)      | -8364.235<br>(<0.001)      | -8327.183<br>(<0.001)        | -8305.587<br>(<0.001)        | -8228.335<br>(<0.001)        |

**Model 1:** Unconditional mean

Level 1:  $TC_{ij} = b_{0i} + e_{ij}$

Level 2:  $b_{0i} = \beta_0 + u_{0i}$

**Model 2:** Unconditional growth model

Level 1:  $TC_{ij} = b_{0i} + b_1 Age_{ij} + e_{ij}$

Level 2:  $b_{0i} = \beta_0 + u_{0i}$

Level 2:  $b_{1i} = \beta_1$

**Model 3:** Quadratic unconditional growth model

Level 1:  $TC_{ij} = b_{0i} + b_1 Age_{ij} + b_2 Age_{ij}^2 + e_{ij}$

Level 2:  $b_{0i} = \beta_0 + u_{0i}$

Level 2:  $b_{1i} = \beta_1$

Level 2:  $b_{2i} = \beta_2$

**Model 4:** Cubic unconditional growth model

Level 1:  $TC_{ij} = b_{0i} + b_1 Age_{ij} + b_2 Age_{ij}^2 + b_3 Age_{ij}^3 + e_{ij}$

Level 2:  $b_{0i} = \beta_0 + u_{0i}$

Level 2:  $b_{1i} = \beta_1$

Level 2:  $b_{2i} = \beta_2$

Level 2:  $b_{3i} = \beta_3$

**Model 5:** Cubic growth model with the intercept and slope variability

Level 1:  $TC_{ij} = b_{0i} + b_1 Age_{ij} + b_2 Age_{ij}^2 + b_3 Age_{ij}^3 + e_{ij}$

Level 2:  $b_{0i} = \beta_0 + u_{0i}$

Level 2:  $b_{1i} = \beta_1 + u_{1i}$

Level 2:  $b_{2i} = \beta_2$

Level 2:  $b_{3i} = \beta_3$

**Final Model:** Was obtained with adding following error structure into Model 5:

**RCS:** Was not adjusted for residual correlation structure

**RH:**  $\sigma^2 \times e^{2\delta \times Age}$

In level 1 of growth models, change over time is modelled at individual-level, and in level 2, it is modelled at group-level.

$\beta_k$  represent population parameter or fixed effect;  $b_{ki}$  represent individual component or random effects;  $u_{ki}$  represents the deviation of  $b_{ki}$  from the value of  $\beta_k$  in the population for individual  $i$ .

Models 1 to 5 were developed without testing residual correlation structure and residual heteroscedasticity, and after reaching the optimal function, three commonly examined types of correlation and variance structure were tested to select the optimal error structure (**Final model**).

**AIC:** Akaike Information Criterion; **Log Likelihood** represents the maximum likelihood estimator of the parameter, and P value is a test of this difference using a likelihood ratio (**LR**) test; **RCS:** Residual correlation structure; **RH:** Residual heteroscedasticity;  $\sigma^2 \times e^{2\delta \times Age}$ : Variance proportional to the exponential of Age multiplied by a constant

**Table S17.** Characteristics of different submodels and final growth model for 2-h post-load plasma (2-hPG) in men

|                                             | Notation       | Value (Standard Error), P value |                         |                         |
|---------------------------------------------|----------------|---------------------------------|-------------------------|-------------------------|
|                                             |                | Model 1                         | Model 2                 | Final model             |
| <b>Intercept</b>                            | $\beta_0$      | 5.80 (0.02),<br><0.001          | 5.78 (0.02),<br><0.001  | 5.81 (0.02),<br><0.001  |
| <b>Age</b>                                  | $\beta_1$      |                                 | 0.05 (0.001),<br><0.001 | 0.04 (0.001),<br><0.001 |
| <b>Variance of random intercept</b>         | $\sigma^2 u_0$ | 1.12 (0.05)                     | 1.02 (0.04)             | 0.96 (0.02)             |
| <b>AIC</b>                                  |                | 50587.49                        | 49337.88                | 49220.22                |
| <b>Log Likelihood (P value for LR test)</b> |                | -25290.74                       | -24664.94<br>(<0.001)   | -24591.11<br>(<0.001)   |

**Model 1:** Unconditional mean

Level 1:  $BMI_{ij} = b_{0i} + e_{ij}$

Level 2:  $b_{0i} = \beta_0 + u_{0i}$

**Model 2:** Unconditional growth model

Level 1:  $BMI_{ij} = b_{0i} + b_1 Age_{ij} + e_{ij}$

Level 2:  $b_{0i} = \beta_0 + u_{0i}$

Level 2:  $b_{1i} = \beta_1$

**Final Model:** Was obtained with adding following error structure into Model 2:

**RCS:** General correlation structure

**RH:** Was not adjusted for variance structure

In level 1 of growth models, change over time is modelled at individual-level, and in level 2, it is modelled at group-level.

$\beta_k$  represent population parameter or fixed effect;  $b_{ki}$  represent individual component or random effects;  $u_{ki}$  represents the deviation of  $b_{ki}$  from the value of  $\beta_k$  in the population for individual  $i$ .

Models 1 and 2 were developed without testing residual correlation structure and residual heteroscedasticity, and after reaching the optimal function, three commonly examined types of correlation and variance structure were tested to select the optimal error structure (**Final model**).

**AIC:** Akaike Information Criterion; **Log Likelihood** represents the maximum likelihood estimator of the parameter, and P value is a test of this difference using a likelihood ratio (**LR**) test; **RCS:** Residual correlation structure; **RH:** Residual heteroscedasticity;  $\sigma^2 \times e^{2\delta \times Age}$ : Variance proportional to the exponential of Age multiplied by a constant

**Table S18.** Characteristics of different submodels and final growth model for 2-h post-load plasma (2-hPG) in women

|                                             | Value (Standard Error), P value |                        |                         |                         |
|---------------------------------------------|---------------------------------|------------------------|-------------------------|-------------------------|
|                                             | Notation                        | Model 1                | Model 2                 | Final model             |
| <b>Intercept</b>                            | $\beta_0$                       | 6.05 (0.02),<br><0.001 | 6.12 (0.02),<br><0.001  | 6.13 (0.02),<br><0.001  |
| <b>Age</b>                                  | $\beta_1$                       |                        | 0.04 (0.001),<br><0.001 | 0.04 (0.001),<br><0.001 |
| <b>Variance of random intercept</b>         | $\sigma^2 u_0$                  | 1.02 (0.04)            | 0.84 (0.03)             | 0.74 (0.03)             |
| <b>AIC</b>                                  |                                 | 63983.61               | 62302.42                | 62002.42                |
| <b>Log Likelihood (P value for LR test)</b> |                                 | -31988.81              | -31147.21<br>(<0.001)   | -30995.21<br>(<0.001)   |

**Model 1:** Unconditional mean

Level 1:  $BMI_{ij} = b_{0i} + e_{ij}$

Level 2:  $b_{0i} = \beta_0 + u_{0i}$

**Model 2:** Unconditional growth model

Level 1:  $BMI_{ij} = b_{0i} + b_{1i}Age_{ij} + e_{ij}$

Level 2:  $b_{0i} = \beta_0 + u_{0i}$

Level 2:  $b_{1i} = \beta_1$

**Final Model:** Was obtained with adding following error structure into Model 2:

**RCS:** First-Order

Autoregressive

**RH:**  $\sigma^2 \times e^{2\delta \times Age}$

In level 1 of growth models, change over time is modelled at individual-level, and in level 2, it is modelled at group-level.

$\beta_k$  represent population parameter or fixed effect;  $b_{ki}$  represent individual component or random effects;  $u_{ki}$  represents the deviation of  $b_{ki}$  from the value of  $\beta_k$  in the population for individual  $i$ .

Models 1 and 2 were developed without testing residual correlation structure and residual heteroscedasticity, and after reaching the optimal function, three commonly examined types of correlation and variance structure were tested to select the optimal error structure (**Final model**).

**AIC:** Akaike Information Criterion; **Log Likelihood** represents the maximum likelihood estimator of the parameter, and P value is a test of this difference using a likelihood ratio (**LR**) test; **RCS:** Residual correlation structure; **RH:** Residual heteroscedasticity;  $\sigma^2 \times e^{2\delta \times Age}$ : Variance proportional to the exponential of Age multiplied by a constant



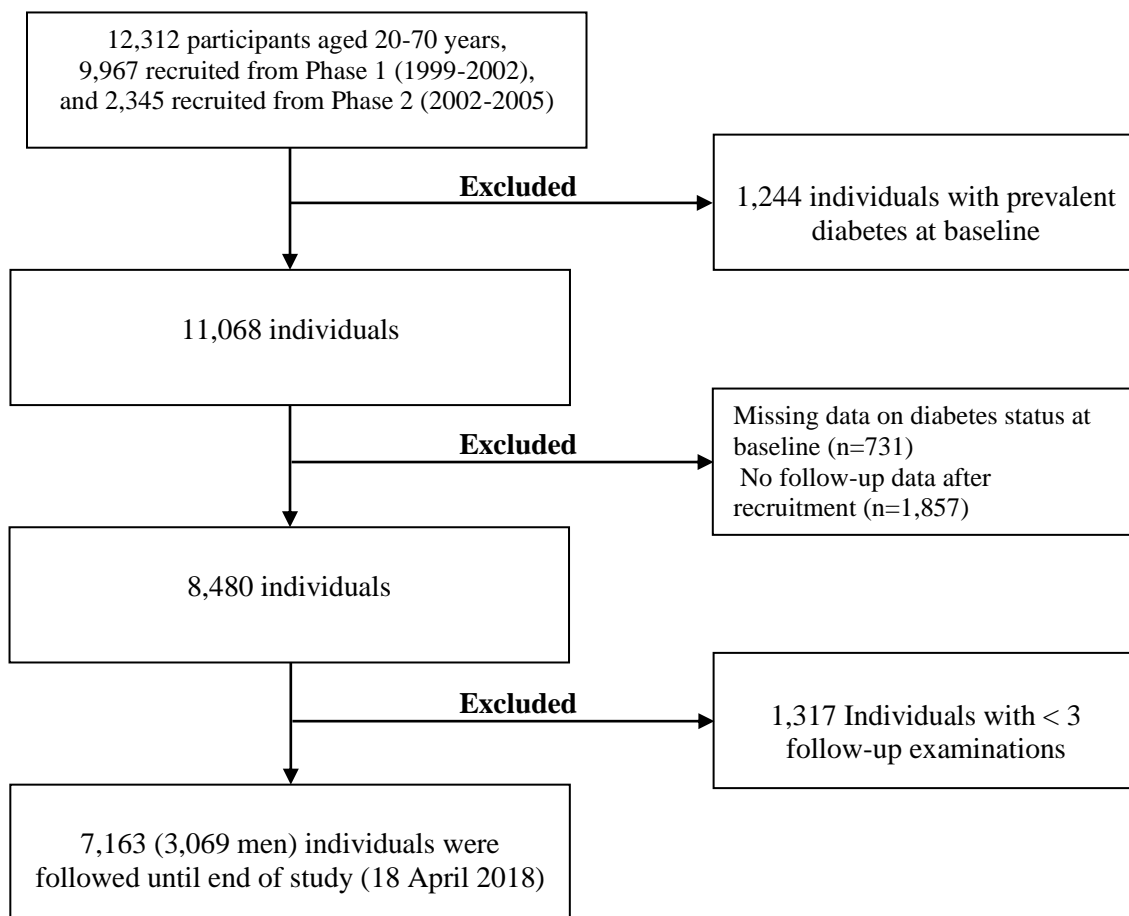

**Supplementary Figure 1:** Study sample selection flow chart, Tehran Lipid and Glucose Study

## BMI

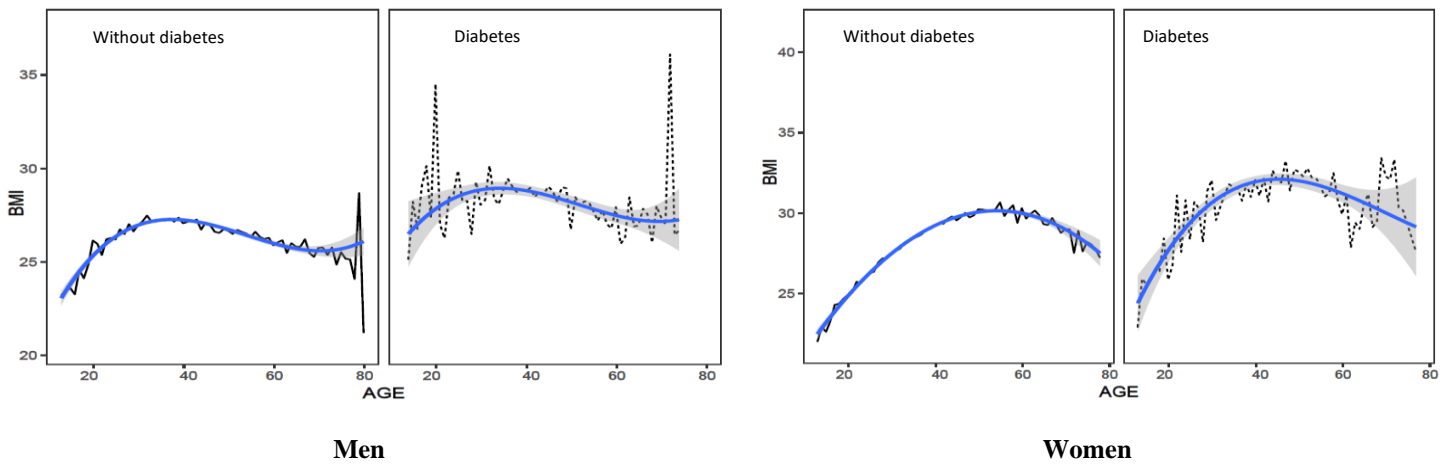

## FPG

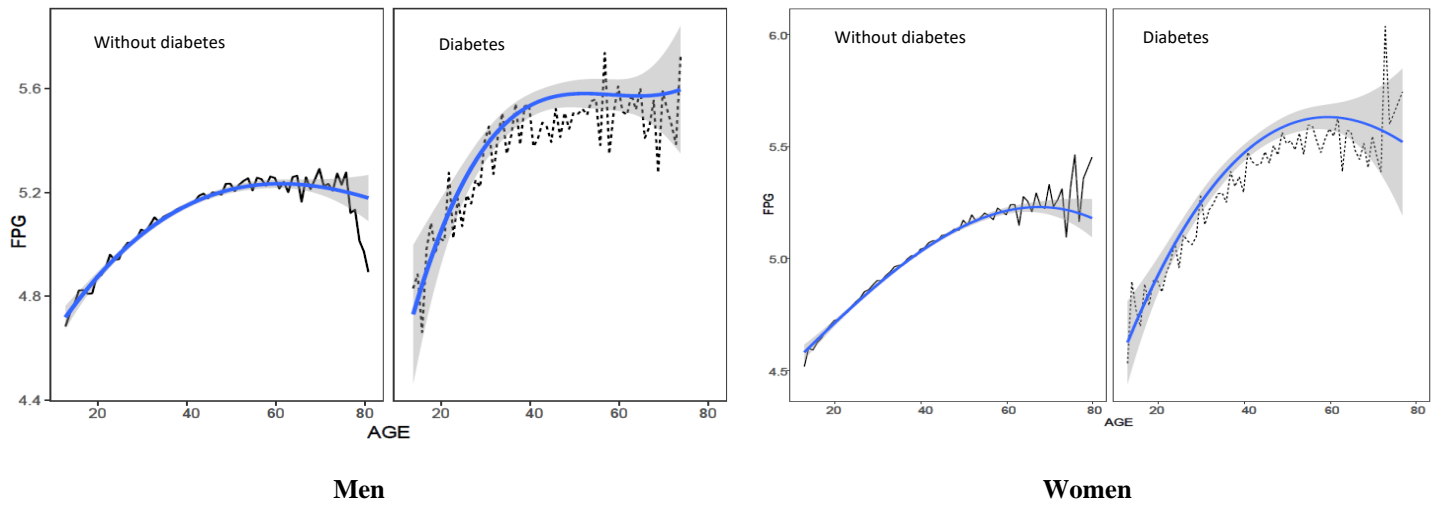

## SBP

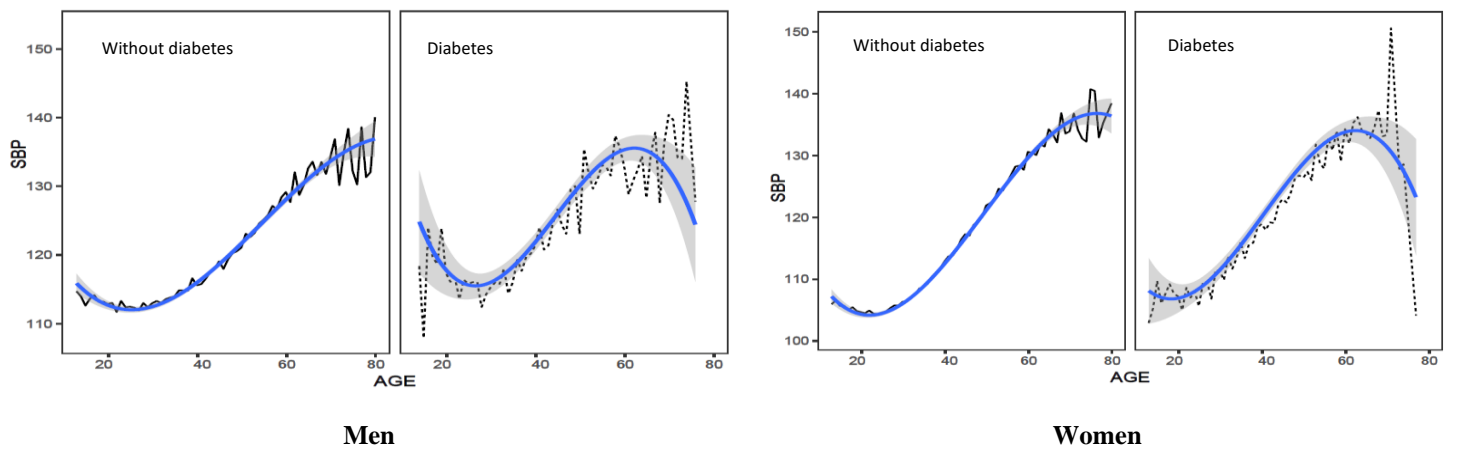

## DBP

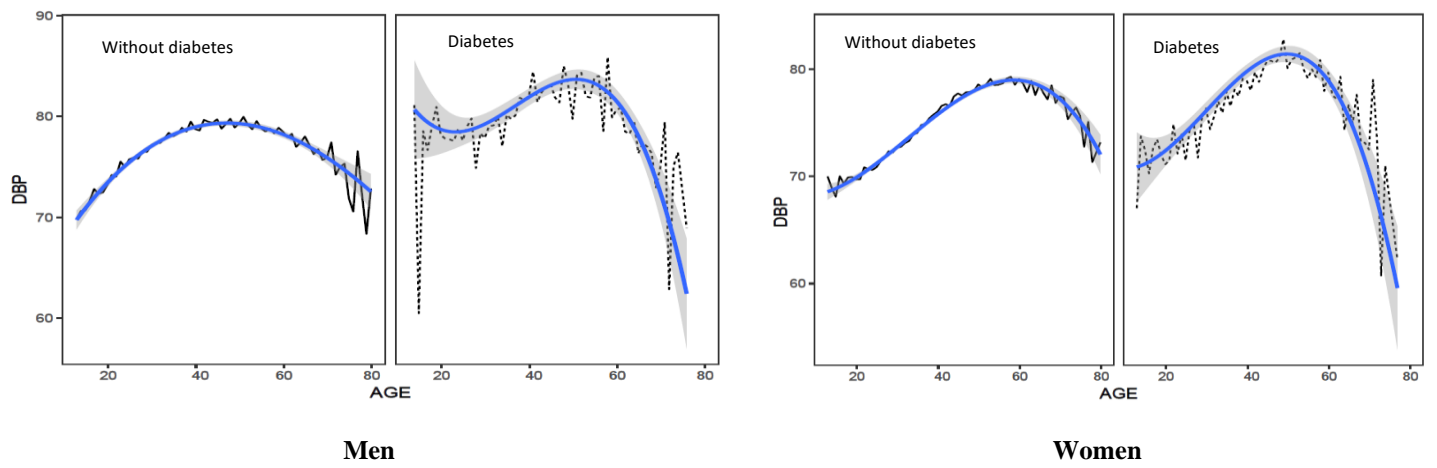

## HDL-C

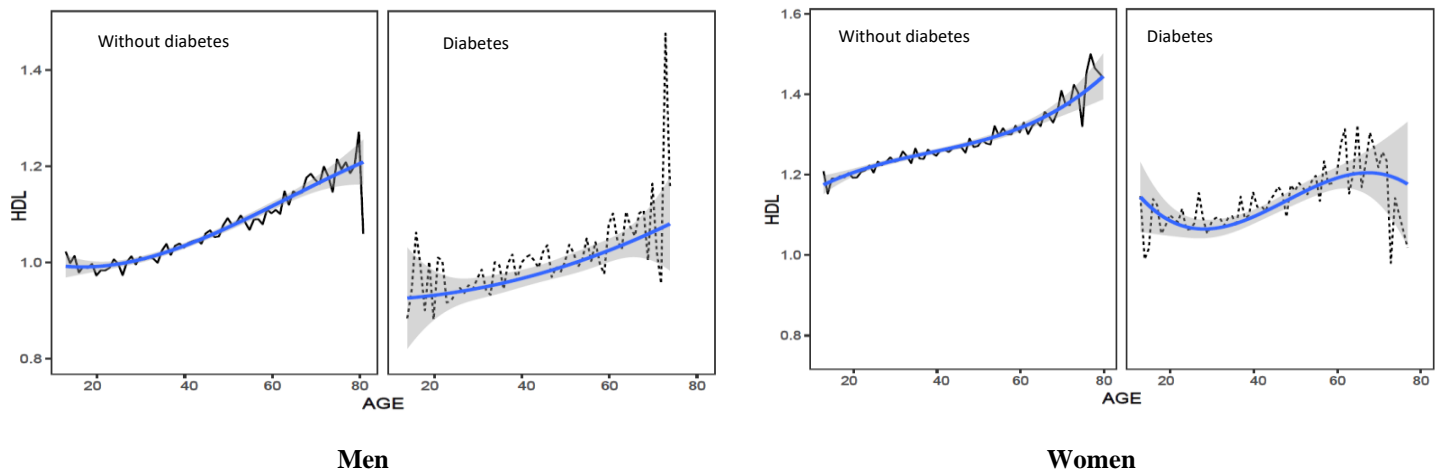

## TC

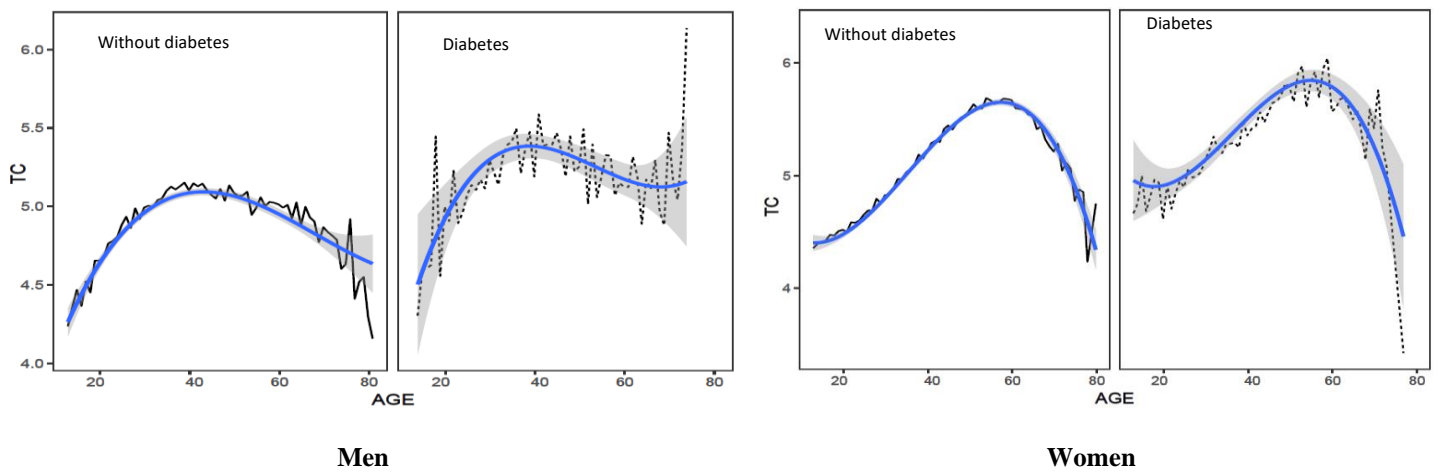

### Ln-TG

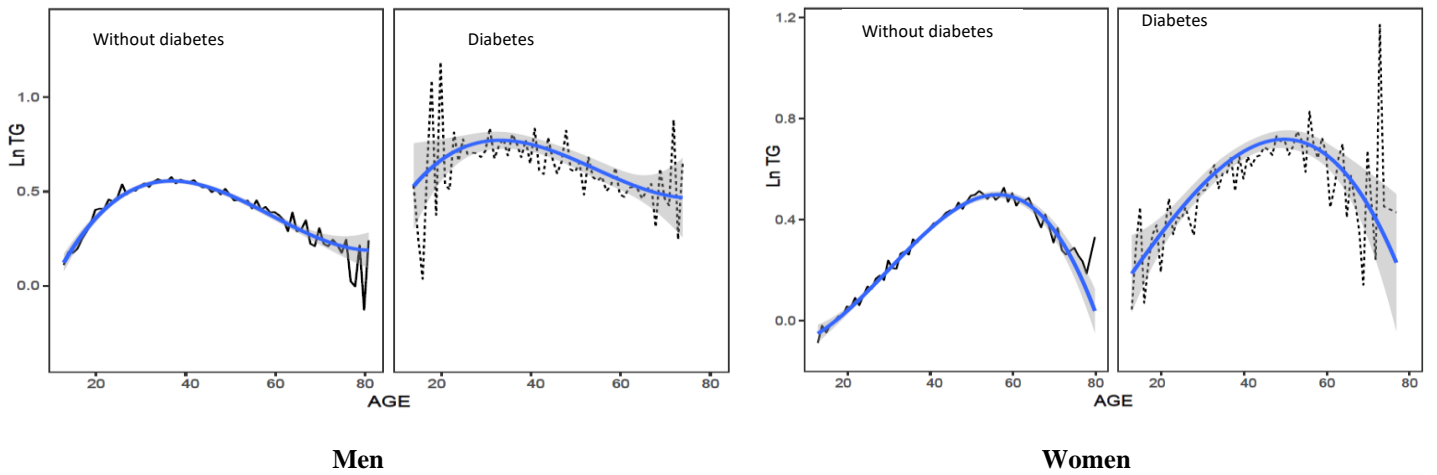

### 2-hPG

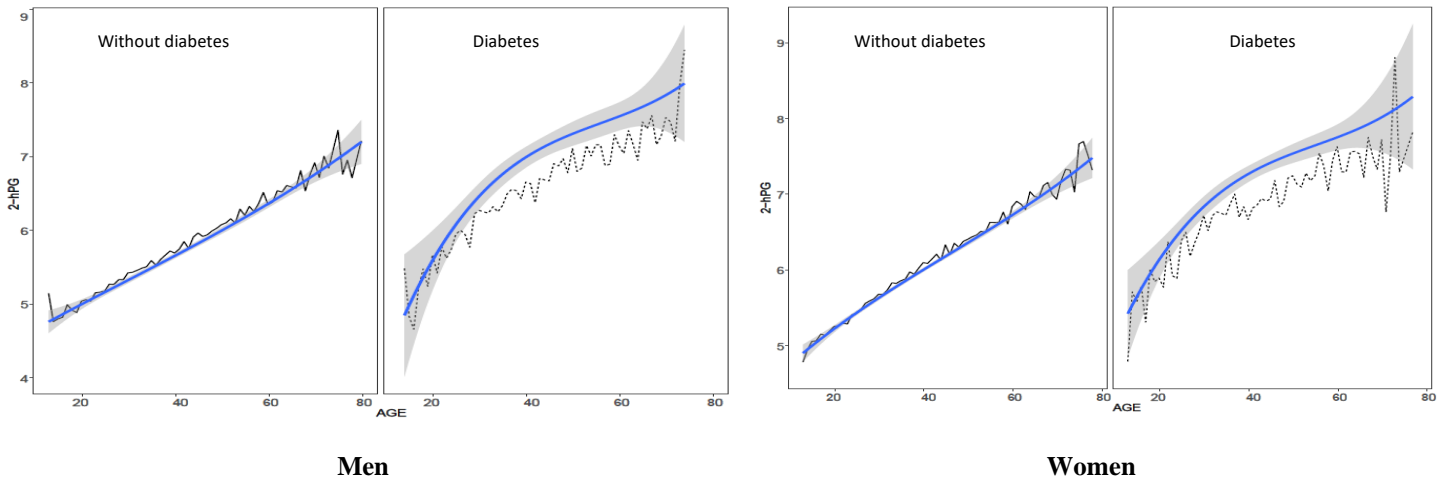

**Supplementary Figure 2:** Mean predicted value for metabolic risk factors from mixed effects models by gender.

The solid and dotted black lines are predictions based on combined fixed and random effects, and the smooth lines were computed using generalized additive model (GAM) with polynomial function. Grey shading indicates  $\pm$  SE

**BMI:** body mass index; **FPG:** fasting plasma glucose; **TC:** total cholesterol; **SBP:** systolic blood pressure; **DBP:** diastolic blood pressure; **HDL-C:** high-density lipoprotein cholesterol; **2-hPG:** 2-h post-load plasma; **Ln-TG:** natural logarithm of triglyceride; **SE:** standard error
